# Supplementary material
Source: publisher figshare collection journal article supplement (https://wiley.figshare.com/articles/dataset/_/3521567)
Supplement: Supplementary file 1 [file 1]

A 12,000-year record of forest history from Cahaba Pond, St. Clair County, Alabama

by Hazel R. Delcourt, Paul A. Delcourt, and Elliott C. Spiker

Published in Ecology, Volume 64 (4)

1983

This microfiche contains three tables of pollen and plant-macrofossil data that were the basis for construction of the diagrams that appear in Figures 6, 7, and 8 of the site report for Cahaba Pond, St. Clair County, Alabama. Table 1 contains the pollen counts tallied by Hazel R. Delcourt for samples obtained from sediment core 79B. Table 1 includes data for trees, shrubs, lianas, upland herbs, ferns and fern allies, unknown grains, obligate aquatics, deteriorated grains, and counts of Eucalyptus grains added to each sample for determination of pollen influx. Table 2 includes pollen influx values calculated for selected taxa. Table 3 contains counts of plant and animal macrofossils tallied by Paul A. Delcourt for samples obtained from sediment core 79B. Values in this table represent number of macrofossils per 100 cm<sup>3</sup> sediment.

TABLE 1

COUNTS OF POLLEN GRAINS AND SPORES FROM SEDIMENT CORE 79B, CAHABA POND, ST. CLAIR COUNTY, ALABAMA

| <u>Pollen and Spore Types</u>                | <u>Sample Depth (cm)</u> |            |            |            |            |            |            |            |            |            |
|----------------------------------------------|--------------------------|------------|------------|------------|------------|------------|------------|------------|------------|------------|
|                                              | <u>0</u>                 | <u>134</u> | <u>140</u> | <u>150</u> | <u>160</u> | <u>170</u> | <u>180</u> | <u>190</u> | <u>200</u> | <u>232</u> |
| TREES                                        |                          |            |            |            |            |            |            |            |            |            |
| <u>Acer negundo</u>                          | 0                        | 0          | 0          | 0          | 0          | 0          | 0          | 0          | 0          | 0          |
| <u>Acer rubrum</u>                           | 0                        | 0          | 0          | 1          | 2          | 0          | 0          | 0          | 0          | 1          |
| <u>Acer saccharum</u>                        | 0                        | 1          | 1          | 1          | 0          | 2          | 0          | 2          | 0          | 0          |
| <u>Acer saccharinum</u>                      | 0                        | 1          | 0          | 0          | 0          | 0          | 0          | 0          | 0          | 2          |
| <u>Acer spicatum</u>                         | 0                        | 0          | 0          | 0          | 0          | 0          | 0          | 0          | 0          | 0          |
| <u>Acer pensylvanicum</u>                    | 0                        | 0          | 0          | 0          | 0          | 0          | 0          | 0          | 0          | 0          |
| <u>Betula</u>                                | 1                        | 0          | 0          | 0          | 0          | 2          | 0          | 1          | 0          | 2          |
| <u>Carpinus/Ostrya type</u>                  | 3                        | 1          | 0          | 3          | 1          | 0          | 1          | 0          | 0          | 1          |
| <u>Carya</u>                                 | 4                        | 7          | 4          | 4          | 9          | 8          | 6          | 6          | 9          | 9          |
| <u>Castanea</u>                              | 0                        | 11         | 12         | 10         | 6          | 10         | 13         | 16         | 8          | 3          |
| <u>Celtis/Maclura type</u>                   | 2                        | 0          | 0          | 1          | 0          | 0          | 0          | 0          | 0          | 1          |
| <u>Cornus alternifolia type</u>              | 0                        | 0          | 0          | 0          | 0          | 1          | 0          | 0          | 1          | 0          |
| <u>Cornus florida</u>                        | 0                        | 0          | 0          | 0          | 0          | 0          | 0          | 0          | 0          | 0          |
| <u>Cupressaceae undiff.</u>                  | 0                        | 0          | 5          | 0          | 0          | 0          | 0          | 0          | 0          | 2          |
| <u>Ericaceae (individual grains)</u>         | 0                        | 0          | 4          | 4          | 0          | 0          | 0          | 0          | 0          | 0          |
| <u>Fagus grandifolia</u>                     | 0                        | 2          | 2          | 2          | 0          | 1          | 3          | 1          | 1          | 1          |
| <u>Fraxinus undiff.</u>                      | 2                        | 1          | 0          | 2          | 8          | 1          | 5          | 2          | 2          | 4          |
| <u>Fraxinus quadrangulata-nigra type</u>     | 0                        | 0          | 0          | 1          | 0          | 0          | 0          | 1          | 0          | 0          |
| <u>Fraxinus pennsylvanica-americana type</u> | 2                        | 0          | 2          | 0          | 1          | 0          | 1          | 0          | 0          | 0          |
| <u>Fraxinus C<sub>3</sub>stp type</u>        | 0                        | 3          | 1          | 1          | 3          | 0          | 2          | 0          | 0          | 2          |
| <u>Ilex type</u>                             | 0                        | 0          | 0          | 0          | 0          | 0          | 0          | 0          | 0          | 0          |
| <u>Juglans cinerea</u>                       | 0                        | 0          | 0          | 0          | 0          | 0          | 0          | 0          | 0          | 0          |
| <u>Juglans undiff.</u>                       | 0                        | 0          | 0          | 0          | 0          | 0          | 0          | 0          | 0          | 0          |
| <u>Juglans nigra</u>                         | 0                        | 0          | 0          | 0          | 0          | 0          | 0          | 0          | 0          | 0          |
| <u>Liquidambar styraciflua</u>               | 31                       | 8          | 13         | 10         | 11         | 9          | 15         | 10         | 19         | 15         |
| <u>Liriodendron tulipifera</u>               | 0                        | 0          | 0          | 0          | 0          | 0          | 0          | 0          | 0          | 0          |
| <u>Magnolia acuminata</u>                    | 0                        | 2          | 0          | 0          | 2          | 0          | 0          | 0          | 0          | 0          |
| <u>Morus</u>                                 | 0                        | 0          | 0          | 1          | 0          | 0          | 0          | 0          | 0          | 0          |
| <u>Nyssa</u>                                 | 24                       | 147        | 133        | 160        | 207        | 181        | 204        | 231        | 297        | 129        |



Pollen and Spore TypesSample Depth (cm)

|                                             | <u>0</u> | <u>134</u> | <u>140</u> | <u>150</u> | <u>160</u> | <u>170</u> | <u>180</u> | <u>190</u> | <u>200</u> | <u>232</u> |
|---------------------------------------------|----------|------------|------------|------------|------------|------------|------------|------------|------------|------------|
| <u>Bidens</u> type                          | 0        | 0          | 0          | 0          | 0          | 0          | 0          | 0          | 0          | 0          |
| <u>Iva ciliata</u> type                     | 0        | 0          | 0          | 0          | 0          | 0          | 0          | 0          | 0          | 0          |
| <u>Cruciferae</u>                           | 0        | 0          | 0          | 0          | 1          | 0          | 0          | 0          | 0          | 0          |
| <u>Cyperaceae</u>                           | 0        | 0          | 0          | 0          | 0          | 0          | 0          | 2          | 0          | 2          |
| <u>Gramineae</u> (wild)                     | 5        | 2          | 1          | 3          | 2          | 2          | 1          | 1          | 1          | 5          |
| <u>Humulus/Cannabis</u> type                | 0        | 0          | 0          | 0          | 0          | 0          | 0          | 0          | 0          | 0          |
| <u>Mentha</u> type                          | 0        | 0          | 0          | 0          | 0          | 0          | 0          | 0          | 0          | 0          |
| <u>Plantago</u> undiff.                     | 0        | 0          | 0          | 0          | 0          | 0          | 0          | 0          | 0          | 0          |
| <u>Thalictrum</u>                           | 0        | 0          | 0          | 0          | 0          | 0          | 0          | 0          | 0          | 0          |
| <u>Urtica</u>                               | 0        | 0          | 0          | 0          | 0          | 0          | 0          | 0          | 0          | 0          |
| FERNS & FERN ALLIES                         |          |            |            |            |            |            |            |            |            |            |
| <u>Dryopteris</u> type                      | 0        | 0          | 0          | 1          | 0          | 0          | 0          | 0          | 0          | 1          |
| <u>Osmunda cinnamomea</u> type              | 0        | 1          | 0          | 0          | 2          | 0          | 1          | 0          | 0          | 0          |
| <u>Osmunda regalis</u> type                 | 0        | 0          | 0          | 0          | 0          | 0          | 0          | 0          | 0          | 0          |
| <u>Pteridium aquilinum</u>                  | 0        | 0          | 0          | 0          | 1          | 0          | 0          | 1          | 1          | 2          |
| Trilete spores undiff.                      | 0        | 0          | 0          | 0          | 0          | 0          | 0          | 0          | 0          | 0          |
| <u>Lycopodium clavatum</u> type             | 0        | 0          | 0          | 0          | 0          | 0          | 0          | 0          | 0          | 0          |
| UNKNOWN                                     | 0        | 0          | 0          | 0          | 1          | 1          | 0          | 0          | 1          | 0          |
| OBLIGATE AQUATIC PLANTS                     |          |            |            |            |            |            |            |            |            |            |
| <u>Brasenia schreberi</u>                   | 0        | 0          | 0          | 0          | 0          | 0          | 0          | 0          | 0          | 0          |
| <u>Decodon verticillatus</u>                | 0        | 0          | 0          | 0          | 0          | 0          | 0          | 0          | 0          | 0          |
| <u>Isoetes</u>                              | 0        | 0          | 0          | 0          | 0          | 0          | 0          | 0          | 0          | 0          |
| <u>Jussiaea</u>                             | 0        | 0          | 0          | 0          | 0          | 0          | 0          | 0          | 0          | 0          |
| <u>Nuphar</u>                               | 0        | 0          | 0          | 0          | 1          | 0          | 0          | 0          | 0          | 0          |
| <u>Nymphaea</u>                             | 0        | 0          | 0          | 0          | 1          | 0          | 0          | 0          | 0          | 0          |
| <u>Nymphoides</u>                           | 0        | 0          | 0          | 0          | 0          | 0          | 0          | 0          | 0          | 0          |
| <u>Potamogeton</u> (subgenus Coleogeton)    | 0        | 0          | 0          | 0          | 0          | 0          | 0          | 0          | 0          | 0          |
| <u>Potamogeton</u> (subgenus Eupotamogeton) | 0        | 0          | 0          | 0          | 0          | 0          | 1          | 0          | 1          | 1          |
| <u>Polygonum hydropiper</u> type            | 0        | 0          | 0          | 0          | 0          | 0          | 1          | 0          | 0          | 1          |
| <u>Sagittaria</u>                           | 0        | 0          | 1          | 1          | 0          | 0          | 0          | 1          | 2          | 0          |
| <u>Sparganium</u> type                      | 0        | 0          | 1          | 0          | 0          | 0          | 0          | 0          | 0          | 0          |
| <u>Sphagnum</u>                             | 0        | 0          | 0          | 0          | 0          | 0          | 0          | 0          | 0          | 0          |
| <u>Utricularia</u>                          | 0        | 0          | 0          | 0          | 0          | 0          | 0          | 0          | 0          | 0          |
| TOTAL DETERIORATED GRAINS                   | 7        | 6          | 9          | 15         | 13         | 7          | 13         | 10         | 18         | 13         |
| TOTAL EUCALYPTUS GRAINS TALLIED             | 31       | 34         | 225        | 114        | 152        | 60         | 92         | 21         | 50         | 155        |
| NUMBER OF EUCALYPTUS TABLETS                | 1        | 2          | 8          | 8          | 8          | 8          | 8          | 2          | 3          | 3          |
| DRY WEIGHT (g) OF EUCALYPTUS TABLETS        | 0.091    | 0.170      | 0.679      | 0.713      | 0.700      | 0.701      | 0.694      | 0.200      | 0.253      | 0.265      |

Pollen and Spore TypesSample Depth (cm)

|                                              | <u>240</u> | <u>250</u> | <u>260</u> | <u>270</u> | <u>280</u> | <u>290</u> | <u>300</u> | <u>320</u> | <u>330</u> | <u>340</u> |
|----------------------------------------------|------------|------------|------------|------------|------------|------------|------------|------------|------------|------------|
| TREES                                        |            |            |            |            |            |            |            |            |            |            |
| <u>Acer negundo</u>                          | 0          | 0          | 0          | 0          | 0          | 1          | 0          | 0          | 1          | 11         |
| <u>Acer rubrum</u>                           | 0          | 5          | 2          | 2          | 2          | 11         | 6          | 3          | 2          | 12         |
| <u>Acer saccharum</u>                        | 1          | 4          | 1          | 0          | 1          | 0          | 0          | 3          | 1          | 0          |
| <u>Acer saccharinum</u>                      | 0          | 0          | 0          | 0          | 2          | 0          | 0          | 1          | 0          | 0          |
| <u>Acer spicatum</u>                         | 0          | 0          | 0          | 0          | 0          | 0          | 2          | 0          | 0          | 0          |
| <u>Acer pensylvanicum</u>                    | 0          | 0          | 0          | 0          | 0          | 0          | 4          | 0          | 0          | 0          |
| <u>Betula</u>                                | 1          | 0          | 0          | 0          | 1          | 0          | 0          | 3          | 0          | 2          |
| <u>Carpinus/Ostrya type</u>                  | 0          | 2          | 0          | 3          | 1          | 3          | 3          | 3          | 3          | 4          |
| <u>Carya</u>                                 | 6          | 17         | 20         | 20         | 12         | 32         | 16         | 19         | 14         | 24         |
| <u>Castanea</u>                              | 5          | 2          | 1          | 2          | 6          | 0          | 1          | 3          | 3          | 0          |
| <u>Celtis/Maclura type</u>                   | 0          | 0          | 0          | 2          | 1          | 0          | 2          | 1          | 1          | 0          |
| <u>Cornus alternifolia type</u>              | 0          | 3          | 0          | 0          | 1          | 3          | 0          | 0          | 0          | 0          |
| <u>Cornus florida</u>                        | 1          | 2          | 0          | 0          | 0          | 2          | 0          | 0          | 0          | 0          |
| <u>Cupressaceae undiff.</u>                  | 0          | 0          | 0          | 0          | 0          | 2          | 0          | 2          | 2          | 3          |
| <u>Ericaceae (individual grains)</u>         | 0          | 12         | 0          | 0          | 0          | 0          | 0          | 0          | 0          | 0          |
| <u>Fagus grandifolia</u>                     | 4          | 0          | 0          | 3          | 5          | 11         | 8          | 8          | 4          | 3          |
| <u>Fraxinus undiff.</u>                      | 2          | 0          | 8          | 3          | 5          | 3          | 9          | 8          | 9          | 9          |
| <u>Fraxinus quadrangulata-nigra type</u>     | 1          | 2          | 1          | 1          | 0          | 5          | 5          | 0          | 19         | 5          |
| <u>Fraxinus pennsylvanica-americana type</u> | 0          | 1          | 0          | 2          | 1          | 3          | 4          | 2          | 1          | 1          |
| <u>Fraxinus C<sub>3</sub>stp type</u>        | 2          | 3          | 1          | 2          | 4          | 3          | 12         | 0          | 7          | 2          |
| <u>Ilex type</u>                             | 0          | 0          | 0          | 0          | 0          | 0          | 0          | 0          | 0          | 0          |
| <u>Juglans cinerea</u>                       | 0          | 0          | 0          | 0          | 0          | 0          | 0          | 0          | 1          | 0          |
| <u>Juglans undiff.</u>                       | 0          | 0          | 2          | 1          | 0          | 2          | 0          | 0          | 0          | 0          |
| <u>Juglans nigra</u>                         | 0          | 0          | 0          | 0          | 0          | 0          | 0          | 0          | 0          | 0          |
| <u>Liquidambar styraciflua</u>               | 9          | 2          | 2          | 2          | 2          | 3          | 6          | 7          | 2          | 2          |
| <u>Liriodendron tulipifera</u>               | 0          | 0          | 0          | 0          | 0          | 0          | 1          | 0          | 0          | 0          |
| <u>Magnolia acuminata</u>                    | 0          | 0          | 0          | 0          | 0          | 0          | 0          | 0          | 0          | 0          |
| <u>Morus</u>                                 | 0          | 0          | 0          | 0          | 0          | 0          | 3          | 0          | 0          | 0          |
| <u>Nyssa</u>                                 | 160        | 7          | 2          | 4          | 4          | 11         | 3          | 22         | 0          | 2          |



Pollen and Spore TypesSample Depth (cm)

|                                             | <u>240</u> | <u>250</u> | <u>260</u> | <u>270</u> | <u>280</u> | <u>290</u> | <u>300</u> | <u>320</u> | <u>330</u> | <u>340</u> |
|---------------------------------------------|------------|------------|------------|------------|------------|------------|------------|------------|------------|------------|
| <u>Bidens</u> type                          | 0          | 4          | 6          | 3          | 0          | 0          | 0          | 0          | 2          | 1          |
| <u>Iva ciliata</u> type                     | 0          | 0          | 0          | 0          | 0          | 0          | 0          | 0          | 0          | 1          |
| <u>Cruciferae</u>                           | 0          | 0          | 0          | 0          | 0          | 0          | 0          | 0          | 0          | 0          |
| <u>Cyperaceae</u>                           | 3          | 1          | 2          | 13         | 1          | 9          | 1          | 4          | 19         | 1          |
| <u>Gramineae</u> (wild)                     | 6          | 18         | 13         | 8          | 7          | 4          | 9          | 6          | 3          | 2          |
| <u>Humulus/Cannabis</u> type                | 0          | 0          | 0          | 0          | 0          | 0          | 0          | 0          | 0          | 0          |
| <u>Mentha</u> type                          | 0          | 0          | 1          | 1          | 1          | 2          | 0          | 0          | 0          | 0          |
| <u>Plantago</u> undiff.                     | 0          | 0          | 1          | 0          | 0          | 0          | 0          | 0          | 0          | 0          |
| <u>Thalictrum</u>                           | 0          | 0          | 0          | 0          | 0          | 0          | 1          | 0          | 0          | 0          |
| <u>Urtica</u>                               | 0          | 0          | 0          | 0          | 0          | 0          | 0          | 0          | 0          | 0          |
| FERNS & FERN ALLIES                         |            |            |            |            |            |            |            |            |            |            |
| <u>Dryopteris</u> type                      | 0          | 0          | 0          | 2          | 0          | 0          | 0          | 0          | 0          | 1          |
| <u>Osmunda cinnamomea</u> type              | 0          | 0          | 1          | 7          | 2          | 5          | 0          | 2          | 0          | 1          |
| <u>Osmunda regalis</u> type                 | 0          | 2          | 9          | 96         | 30         | 42         | 11         | 1          | 12         | 5          |
| <u>Pteridium aquilinum</u>                  | 0          | 4          | 1          | 1          | 3          | 0          | 0          | 0          | 0          | 0          |
| Trilete spores undiff.                      | 0          | 0          | 0          | 0          | 0          | 0          | 0          | 1          | 0          | 0          |
| <u>Lycopodium clavatum</u> type             | 0          | 0          | 0          | 0          | 0          | 0          | 0          | 0          | 0          | 0          |
| UNKNOWN                                     | 0          | 2          | 0          | 1          | 0          | 1          | 1          | 0          | 0          | 0          |
| OBLIGATE AQUATIC PLANTS                     |            |            |            |            |            |            |            |            |            |            |
| <u>Brasenia schreberi</u>                   | 0          | 0          | 0          | 0          | 0          | 0          | 0          | 1          | 0          | 0          |
| <u>Decodon verticillatus</u>                | 5          | 3          | 2          | 9          | 6          | 5          | 0          | 5          | 0          | 0          |
| <u>Isoetes</u>                              | 0          | 2          | 0          | 0          | 0          | 0          | 0          | 0          | 0          | 0          |
| <u>Jussiaea</u>                             | 0          | 0          | 0          | 0          | 0          | 0          | 0          | 0          | 0          | 0          |
| <u>Nuphar</u>                               | 0          | 0          | 2          | 0          | 0          | 0          | 3          | 3          | 6          | 13         |
| <u>Nymphaea</u>                             | 0          | 0          | 0          | 0          | 0          | 0          | 0          | 0          | 0          | 0          |
| <u>Nymphoides</u>                           | 0          | 0          | 0          | 0          | 0          | 0          | 0          | 0          | 0          | 0          |
| <u>Potamogeton</u> (subgenus Coleogeton)    | 1          | 0          | 0          | 0          | 0          | 0          | 0          | 0          | 0          | 0          |
| <u>Potamogeton</u> (subgenus Eupotamogeton) | 0          | 1          | 0          | 1          | 0          | 0          | 0          | 1          | 0          | 0          |
| <u>Polygonum hydropiper</u> type            | 0          | 2          | 2          | 0          | 0          | 0          | 0          | 0          | 0          | 0          |
| <u>Sagittaria</u>                           | 0          | 0          | 0          | 0          | 0          | 0          | 0          | 0          | 2          | 2          |
| <u>Sparganium</u> type                      | 0          | 0          | 0          | 0          | 0          | 0          | 0          | 0          | 0          | 0          |
| <u>Sphagnum</u>                             | 0          | 0          | 0          | 0          | 0          | 1          | 0          | 0          | 0          | 0          |
| <u>Utricularia</u>                          | 0          | 0          | 0          | 0          | 0          | 0          | 0          | 0          | 0          | 0          |
| TOTAL DETERIORATED GRAINS                   | 7          | 12         | 25         | 12         | 12         | 17         | 4          | 16         | 12         | 4          |
| TOTAL EUCALYPTUS GRAINS TALLIED             | 41         | 146        | 184        | 407        | 479        | 309        | 1022       | 215        | 217        | 1154       |
| NUMBER OF EUCALYPTUS TABLETS                | 3          | 2          | 3          | 3          | 3          | 3          | 3          | 2          | 3          | 3          |
| DRY WEIGHT (g) OF EUCALYPTUS TABLETS        | 0.284      | 0.179      | 0.259      | 0.270      | 0.273      | 0.252      | 0.260      | 0.183      | 0.262      | 0.258      |

Pollen and Spore TypesSample Depth (cm)

|                                              | <u>350</u> | <u>360</u> | <u>370</u> | <u>380</u> | <u>390</u> | <u>400</u> | <u>410</u> | <u>420</u> | <u>430</u> | <u>440</u> |
|----------------------------------------------|------------|------------|------------|------------|------------|------------|------------|------------|------------|------------|
| TREES                                        |            |            |            |            |            |            |            |            |            |            |
| <u>Acer negundo</u>                          | 0          | 1          | 0          | 1          | 3          | 1          | 3          | 1          | 2          | 6          |
| <u>Acer rubrum</u>                           | 9          | 2          | 18         | 15         | 14         | 7          | 12         | 25         | 21         | 19         |
| <u>Acer saccharum</u>                        | 0          | 0          | 0          | 1          | 2          | 1          | 0          | 0          | 1          | 1          |
| <u>Acer saccharinum</u>                      | 0          | 1          | 2          | 0          | 0          | 3          | 0          | 2          | 0          | 0          |
| <u>Acer spicatum</u>                         | 0          | 0          | 0          | 0          | 0          | 0          | 0          | 0          | 0          | 0          |
| <u>Acer pensylvanicum</u>                    | 0          | 0          | 0          | 0          | 0          | 0          | 0          | 0          | 0          | 0          |
| <u>Betula</u>                                | 1          | 1          | 7          | 1          | 2          | 1          | 2          | 6          | 4          | 9          |
| <u>Carpinus/Ostrya type</u>                  | 2          | 4          | 2          | 1          | 2          | 4          | 6          | 5          | 2          | 4          |
| <u>Carya</u>                                 | 30         | 35         | 23         | 20         | 24         | 19         | 24         | 30         | 10         | 11         |
| <u>Castanea</u>                              | 10         | 1          | 16         | 14         | 17         | 9          | 3          | 24         | 17         | 16         |
| <u>Celtis/Maclura type</u>                   | 0          | 0          | 0          | 2          | 0          | 2          | 0          | 0          | 0          | 1          |
| <u>Cornus alternifolia type</u>              | 1          | 0          | 0          | 0          | 0          | 0          | 0          | 0          | 0          | 0          |
| <u>Cornus florida</u>                        | 0          | 0          | 0          | 0          | 0          | 0          | 0          | 0          | 0          | 0          |
| <u>Cupressaceae undiff.</u>                  | 1          | 0          | 0          | 0          | 4          | 1          | 1          | 0          | 1          | 2          |
| <u>Ericaceae (individual grains)</u>         | 0          | 0          | 0          | 0          | 0          | 0          | 0          | 0          | 0          | 0          |
| <u>Fagus grandifolia</u>                     | 1          | 1          | 3          | 2          | 2          | 4          | 1          | 2          | 4          | 3          |
| <u>Fraxinus undiff.</u>                      | 5          | 7          | 2          | 6          | 6          | 1          | 1          | 1          | 4          | 7          |
| <u>Fraxinus quadrangulata-nigra type</u>     | 5          | 1          | 0          | 3          | 6          | 0          | 6          | 1          | 6          | 6          |
| <u>Fraxinus pennsylvanica-americana type</u> | 1          | 1          | 0          | 0          | 3          | 1          | 0          | 0          | 3          | 2          |
| <u>Fraxinus C<sub>3</sub>stp type</u>        | 3          | 1          | 1          | 2          | 1          | 3          | 1          | 0          | 3          | 6          |
| <u>Ilex type</u>                             | 0          | 0          | 0          | 0          | 0          | 0          | 1          | 0          | 1          | 0          |
| <u>Juglans cinerea</u>                       | 0          | 1          | 2          | 0          | 1          | 1          | 2          | 1          | 0          | 1          |
| <u>Juglans undiff.</u>                       | 0          | 0          | 1          | 0          | 0          | 0          | 0          | 0          | 1          | 1          |
| <u>Juglans nigra</u>                         | 0          | 0          | 0          | 0          | 0          | 0          | 0          | 0          | 0          | 0          |
| <u>Liquidambar styraciflua</u>               | 0          | 1          | 1          | 2          | 1          | 2          | 1          | 0          | 0          | 0          |
| <u>Liriodendron tulipifera</u>               | 0          | 0          | 0          | 0          | 0          | 0          | 0          | 0          | 0          | 0          |
| <u>Magnolia acuminata</u>                    | 1          | 0          | 0          | 1          | 0          | 0          | 2          | 1          | 2          | 2          |
| <u>Morus</u>                                 | 0          | 0          | 0          | 0          | 0          | 0          | 0          | 0          | 0          | 0          |
| <u>Nyssa</u>                                 | 1          | 0          | 1          | 0          | 0          | 4          | 2          | 1          | 1          | 0          |



Pollen and Spore TypesSample Depth (cm)

|                                     | <u>350</u> | <u>360</u> | <u>370</u> | <u>380</u> | <u>390</u> | <u>400</u> | <u>410</u> | <u>420</u> | <u>430</u> | <u>440</u> |
|-------------------------------------|------------|------------|------------|------------|------------|------------|------------|------------|------------|------------|
| <u>Picea</u>                        | 1          | 0          | 0          | 3          | 0          | 0          | 1          | 0          | 0          | 0          |
| <u>Pinus undiff.</u>                | 9          | 16         | 13.5       | 7.5        | 12         | 17.5       | 12.5       | 9.5        | 12.5       | 19         |
| <u>Diploxylon Pinus</u>             | 0          | 5          | 2.5        | 1          | 10         | 0          | 5          | 6.5        | 2          | 8          |
| <u>Haploxylon Pinus</u>             | 0          | 1          | 1          | 0          | 0          | 0          | 0          | 0          | 0          | 1          |
| <u>Planera aquatica</u>             | 0          | 0          | 0          | 0          | 0          | 0          | 0          | 0          | 0          | 0          |
| <u>Platanus occidentalis</u>        | 1          | 0          | 0          | 0          | 0          | 3          | 1          | 0          | 0          | 0          |
| <u>Populus</u>                      | 0          | 0          | 0          | 0          | 0          | 0          | 0          | 0          | 0          | 0          |
| <u>Prunus type</u>                  | 0          | 0          | 0          | 0          | 0          | 0          | 0          | 0          | 0          | 0          |
| <u>Quercus</u>                      | 220        | 215        | 210        | 213        | 185        | 212        | 211        | 198        | 201        | 166        |
| <u>Ptelea trifoliata</u>            | 0          | 0          | 0          | 0          | 0          | 0          | 0          | 0          | 0          | 0          |
| <u>Rhamnus</u>                      | 0          | 0          | 0          | 0          | 0          | 0          | 0          | 0          | 0          | 0          |
| <u>Rhus undiff.</u>                 | 0          | 0          | 0          | 0          | 0          | 0          | 0          | 0          | 0          | 0          |
| <u>Rhus copallina</u>               | 0          | 0          | 0          | 0          | 0          | 0          | 0          | 0          | 0          | 0          |
| <u>Salix</u>                        | 2          | 0          | 1          | 0          | 0          | 1          | 0          | 4          | 3          | 2          |
| <u>Taxodium</u>                     | 1          | 0          | 0          | 0          | 0          | 0          | 0          | 0          | 0          | 0          |
| <u>Tilia</u>                        | 0          | 0          | 0          | 0          | 0          | 0          | 0          | 0          | 0          | 0          |
| <u>Tsuga</u>                        | 0          | 0          | 0          | 1          | 2          | 0          | 0          | 2          | 2          | 1          |
| <u>Ulmus</u>                        | 3          | 2          | 2          | 7          | 7          | 6          | 7          | 5          | 1          | 5          |
| <u>Viburnum undiff.</u>             | 0          | 0          | 0          | 0          | 0          | 0          | 0          | 0          | 0          | 1          |
| TOTAL ARBOREAL POLLEN               | 308        | 306        | 309        | 303.5      | 304        | 303.5      | 305.5      | 325        | 304.5      | 300        |
| SHRUBS                              |            |            |            |            |            |            |            |            |            |            |
| <u>Alnus rugosa-serrulata type</u>  | 2          | 0          | 2          | 6          | 2          | 0          | 2          | 4          | 3          | 2          |
| <u>Cephalanthus occidentalis</u>    | 1          | 7          | 4          | 3          | 15         | 1          | 4          | 5          | 3          | 0          |
| <u>Corylus</u>                      | 0          | 0          | 3          | 1          | 0          | 0          | 1          | 0          | 0          | 1          |
| <u>Itea virginica</u>               | 0          | 0          | 0          | 0          | 0          | 0          | 0          | 0          | 0          | 0          |
| <u>Lonicera</u>                     | 0          | 0          | 0          | 0          | 0          | 0          | 0          | 0          | 0          | 0          |
| <u>Sambucus</u>                     | 0          | 0          | 0          | 0          | 0          | 0          | 0          | 0          | 1          | 0          |
| <u>Rubus</u>                        | 0          | 0          | 0          | 0          | 1          | 0          | 6          | 0          | 0          | 0          |
| <u>Sarcobatus</u>                   | 0          | 0          | 0          | 0          | 0          | 0          | 0          | 0          | 0          | 0          |
| LIANAS                              |            |            |            |            |            |            |            |            |            |            |
| <u>Parthenocissus</u>               | 0          | 0          | 0          | 0          | 0          | 0          | 0          | 0          | 0          | 0          |
| <u>Vitis</u>                        | 0          | 0          | 0          | 0          | 0          | 1          | 0          | 0          | 1          | 4          |
| UPLAND HERBS                        |            |            |            |            |            |            |            |            |            |            |
| <u>Caryophyllaceae</u>              | 0          | 0          | 0          | 0          | 0          | 0          | 0          | 0          | 0          | 0          |
| <u>Chenopodiaceae/Amaranthaceae</u> | 0          | 0          | 0          | 0          | 0          | 0          | 0          | 0          | 0          | 0          |
| <u>Tubuliflorae undiff.</u>         | 0          | 2          | 2          | 1          | 1          | 1          | 3          | 2          | 1          | 3          |
| <u>Ambrosia type</u>                | 2          | 1          | 4          | 0          | 2          | 3          | 1          | 7          | 3          | 4          |
| <u>Artemisia</u>                    | 0          | 0          | 0          | 0          | 1          | 0          | 1          | 0          | 1          | 0          |

Pollen and Spore TypesSample Depth (cm)

|                                             | <u>350</u> | <u>360</u> | <u>370</u> | <u>380</u> | <u>390</u> | <u>400</u> | <u>410</u> | <u>420</u> | <u>430</u> | <u>440</u> |
|---------------------------------------------|------------|------------|------------|------------|------------|------------|------------|------------|------------|------------|
| <u>Bidens</u> type                          | 0          | 0          | 0          | 0          | 1          | 0          | 2          | 0          | 3          | 0          |
| <u>Iva ciliata</u> type                     | 0          | 0          | 0          | 0          | 0          | 0          | 0          | 0          | 0          | 0          |
| Cruciferae                                  | 0          | 0          | 0          | 0          | 0          | 0          | 0          | 0          | 0          | 0          |
| Cyperaceae                                  | 1          | 8          | 3          | 6          | 4          | 3          | 4          | 2          | 4          | 4          |
| Gramineae (wild)                            | 8          | 8          | 7          | 6          | 3          | 6          | 6          | 4          | 8          | 6          |
| <u>Humulus/Cannabis</u> type                | 0          | 0          | 0          | 0          | 0          | 0          | 0          | 0          | 0          | 0          |
| <u>Mentha</u> type                          | 0          | 0          | 0          | 0          | 0          | 0          | 0          | 0          | 0          | 0          |
| <u>Plantago</u> undiff.                     | 0          | 0          | 0          | 2          | 1          | 0          | 0          | 0          | 0          | 0          |
| <u>Thalictrum</u>                           | 0          | 2          | 0          | 0          | 0          | 0          | 0          | 0          | 0          | 0          |
| <u>Urtica</u>                               | 0          | 0          | 0          | 0          | 0          | 0          | 3          | 0          | 0          | 0          |
| FERNS & FERN ALLIES                         |            |            |            |            |            |            |            |            |            |            |
| <u>Dryopteris</u> type                      | 1          | 0          | 0          | 0          | 0          | 0          | 1          | 0          | 2          | 0          |
| <u>Osmunda cinnamomea</u> type              | 5          | 1          | 6          | 0          | 1          | 0          | 0          | 2          | 5          | 2          |
| <u>Osmunda regalis</u> type                 | 0          | 2          | 1          | 6          | 2          | 4          | 6          | 0          | 5          | 2          |
| <u>Pteridium aquilinum</u>                  | 0          | 1          | 0          | 0          | 0          | 1          | 0          | 0          | 0          | 0          |
| Trilete spores undiff.                      | 0          | 0          | 0          | 0          | 0          | 0          | 0          | 0          | 0          | 0          |
| <u>Lycopodium clavatum</u> type             | 0          | 1          | 0          | 0          | 0          | 0          | 0          | 0          | 0          | 0          |
| UNKNOWN                                     | 0          | 0          | 0          | 0          | 0          | 0          | 0          | 0          | 0          | 0          |
| OBLIGATE AQUATIC PLANTS                     |            |            |            |            |            |            |            |            |            |            |
| <u>Brasenia schreberi</u>                   | 0          | 0          | 0          | 0          | 0          | 0          | 0          | 0          | 0          | 0          |
| <u>Decodon verticillatus</u>                | 0          | 0          | 0          | 0          | 0          | 0          | 0          | 0          | 0          | 0          |
| <u>Isoetes</u>                              | 0          | 0          | 0          | 0          | 0          | 0          | 0          | 0          | 0          | 0          |
| <u>Jussiaea</u>                             | 0          | 0          | 0          | 0          | 0          | 0          | 2          | 0          | 5          | 0          |
| <u>Nuphar</u>                               | 15         | 3          | 10         | 14         | 10         | 13         | 5          | 6          | 15         | 5          |
| <u>Nymphaea</u>                             | 0          | 1          | 0          | 2          | 1          | 0          | 0          | 0          | 1          | 4          |
| <u>Nymphoides</u>                           | 0          | 0          | 0          | 0          | 0          | 0          | 0          | 0          | 0          | 0          |
| <u>Potamogeton</u> (subgenus Coleogeton)    | 0          | 0          | 0          | 0          | 1          | 0          | 0          | 1          | 0          | 0          |
| <u>Potamogeton</u> (subgenus Eupotamogeton) | 0          | 2          | 0          | 0          | 1          | 0          | 1          | 0          | 2          | 0          |
| <u>Polygonum hydropiper</u> type            | 0          | 0          | 0          | 0          | 0          | 0          | 0          | 0          | 0          | 0          |
| <u>Sagittaria</u>                           | 10         | 6          | 0          | 3          | 3          | 2          | 2          | 0          | 0          | 1          |
| <u>Sparganium</u> type                      | 0          | 0          | 0          | 0          | 0          | 0          | 0          | 0          | 0          | 0          |
| <u>Sphagnum</u>                             | 0          | 0          | 0          | 0          | 0          | 0          | 0          | 0          | 0          | 0          |
| <u>Utricularia</u>                          | 0          | 0          | 0          | 0          | 0          | 2          | 0          | 0          | 0          | 0          |
| TOTAL DETERIORATED GRAINS                   | 3          | 16         | 3          | 4          | 6          | 6          | 11         | 2          | 5          | 6          |
| TOTAL EUCALYPTUS GRAINS TALLIED             | 246        | 347        | 188        | 261        | 257        | 226        | 269        | 134        | 167        | 177        |
| NUMBER OF EUCALYPTUS TABLETS                | 3          | 3          | 2          | 3          | 3          | 3          | 3          | 2          | 3          | 3          |
| DRY WEIGHT (g) OF EUCALYPTUS TABLETS        | 0.267      | 0.268      | 0.166      | 0.272      | 0.266      | 0.248      | 0.263      | 0.177      | 0.257      | 0.266      |

Pollen and Spore TypesSample Depth (cm)

|                                              | <u>450</u> | <u>460</u> | <u>470</u> | <u>480</u> | <u>520</u> | <u>530</u> | <u>540</u> | <u>550</u> | <u>560</u> | <u>570</u> |
|----------------------------------------------|------------|------------|------------|------------|------------|------------|------------|------------|------------|------------|
| TREES                                        |            |            |            |            |            |            |            |            |            |            |
| <u>Acer negundo</u>                          | 0          | 1          | 1          | 0          | 0          | 3          | 0          | 0          | 0          | 1          |
| <u>Acer rubrum</u>                           | 23         | 3          | 6          | 3          | 1          | 2          | 4          | 0          | 0          | 0          |
| <u>Acer saccharum</u>                        | 2          | 1          | 2          | 0          | 2          | 2          | 0          | 1          | 2          | 1          |
| <u>Acer saccharinum</u>                      | 1          | 0          | 0          | 1          | 4          | 0          | 0          | 0          | 0          | 0          |
| <u>Acer spicatum</u>                         | 0          | 0          | 0          | 0          | 0          | 0          | 1          | 0          | 0          | 1          |
| <u>Acer pensylvanicum</u>                    | 0          | 0          | 0          | 0          | 0          | 0          | 1          | 1          | 0          | 0          |
| <u>Betula</u>                                | 4          | 8          | 6          | 12         | 9          | 12         | 10         | 3          | 5          | 0          |
| <u>Carpinus/Ostrya</u> type                  | 4          | 3          | 5          | 4          | 4          | 4          | 12         | 15         | 17         | 20         |
| <u>Carya</u>                                 | 21         | 14         | 17         | 30         | 18         | 25         | 18         | 24         | 19         | 47         |
| <u>Castanea</u>                              | 22         | 15         | 26         | 21         | 8          | 4          | 1          | 0          | 1          | 0          |
| <u>Celtis/Maclura</u> type                   | 0          | 1          | 0          | 1          | 0          | 0          | 0          | 1          | 0          | 3          |
| <u>Cornus alternifolia</u> type              | 0          | 0          | 0          | 0          | 0          | 0          | 0          | 0          | 0          | 0          |
| <u>Cornus florida</u>                        | 0          | 0          | 0          | 0          | 0          | 0          | 0          | 0          | 0          | 1          |
| <u>Cupressaceae</u> undiff.                  | 3          | 1          | 1          | 3          | 2          | 4          | 8          | 7          | 3          | 2          |
| <u>Ericaceae</u> (individual grains)         | 0          | 0          | 0          | 0          | 0          | 0          | 0          | 0          | 0          | 4          |
| <u>Fagus grandifolia</u>                     | 1          | 1          | 4          | 3          | 4          | 7          | 8          | 28         | 138        | 125        |
| <u>Fraxinus</u> undiff.                      | 3          | 5          | 9          | 2          | 6          | 2          | 2          | 0          | 5          | 9          |
| <u>Fraxinus quadrangulata-nigra</u> type     | 2          | 1          | 3          | 1          | 6          | 1          | 1          | 1          | 4          | 3          |
| <u>Fraxinus pennsylvanica-americana</u> type | 3          | 5          | 4          | 1          | 1          | 2          | 2          | 5          | 3          | 0          |
| <u>Fraxinus C<sub>3</sub>stp</u> type        | 3          | 1          | 0          | 2          | 4          | 1          | 5          | 2          | 2          | 2          |
| <u>Ilex</u> type                             | 0          | 0          | 0          | 0          | 0          | 3          | 0          | 0          | 1          | 0          |
| <u>Juglans cinerea</u>                       | 1          | 0          | 0          | 0          | 0          | 0          | 2          | 0          | 0          | 0          |
| <u>Juglans</u> undiff.                       | 0          | 0          | 0          | 1          | 1          | 0          | 1          | 2          | 0          | 0          |
| <u>Juglans nigra</u>                         | 0          | 0          | 1          | 1          | 1          | 0          | 0          | 0          | 0          | 1          |
| <u>Liquidambar styraciflua</u>               | 0          | 0          | 0          | 0          | 0          | 0          | 0          | 0          | 0          | 1          |
| <u>Liriodendron tulipifera</u>               | 0          | 0          | 0          | 0          | 0          | 0          | 0          | 0          | 0          | 0          |
| <u>Magnolia acuminata</u>                    | 4          | 2          | 12         | 5          | 11         | 9          | 32         | 32         | 0          | 0          |
| <u>Morus</u>                                 | 0          | 0          | 0          | 0          | 0          | 0          | 0          | 0          | 0          | 0          |
| <u>Nyssa</u>                                 | 0          | 0          | 0          | 0          | 19         | 0          | 3          | 0          | 1          | 0          |



Pollen and Spore TypesSample Depth (cm)

|                                             | <u>450</u> | <u>460</u> | <u>470</u> | <u>480</u> | <u>520</u> | <u>530</u> | <u>540</u> | <u>550</u> | <u>560</u> | <u>570</u> |
|---------------------------------------------|------------|------------|------------|------------|------------|------------|------------|------------|------------|------------|
| <u>Bidens</u> type                          | 0          | 0          | 0          | 0          | 0          | 2          | 0          | 1          | 1          | 0          |
| <u>Iva ciliata</u> type                     | 0          | 0          | 0          | 0          | 0          | 0          | 0          | 0          | 0          | 0          |
| Cruciferae                                  | 0          | 0          | 0          | 0          | 0          | 1          | 0          | 0          | 0          | 0          |
| Cyperaceae                                  | 8          | 1          | 3          | 18         | 13         | 10         | 4          | 4          | 2          | 1          |
| Gramineae (wild)                            | 11         | 6          | 15         | 9          | 10         | 17         | 28         | 10         | 3          | 3          |
| <u>Humulus/Cannabis</u> type                | 0          | 0          | 0          | 0          | 0          | 0          | 0          | 0          | 0          | 0          |
| <u>Mentha</u> type                          | 0          | 0          | 0          | 0          | 0          | 0          | 0          | 0          | 0          | 0          |
| <u>Plantago</u> undiff.                     | 0          | 0          | 0          | 0          | 0          | 0          | 0          | 0          | 0          | 0          |
| <u>Thalictrum</u>                           | 0          | 0          | 0          | 0          | 0          | 0          | 0          | 0          | 0          | 0          |
| <u>Urtica</u>                               | 0          | 0          | 0          | 0          | 0          | 0          | 0          | 0          | 0          | 0          |
| FERNS & FERN ALLIES                         |            |            |            |            |            |            |            |            |            |            |
| <u>Dryopteris</u> type                      | 1          | 0          | 0          | 0          | 0          | 2          | 0          | 0          | 1          | 0          |
| <u>Osmunda cinnamomea</u> type              | 2          | 9          | 2          | 0          | 1          | 5          | 0          | 1          | 0          | 0          |
| <u>Osmunda regalis</u> type                 | 2          | 0          | 0          | 0          | 0          | 0          | 0          | 0          | 0          | 1          |
| <u>Pteridium aquilinum</u>                  | 0          | 0          | 0          | 0          | 0          | 0          | 0          | 1          | 0          | 0          |
| Trilete spores undiff.                      | 0          | 0          | 0          | 0          | 0          | 0          | 0          | 0          | 0          | 0          |
| <u>Lycopodium clavatum</u> type             | 0          | 0          | 0          | 0          | 0          | 0          | 0          | 0          | 0          | 0          |
| UNKNOWN                                     | 0          | 0          | 0          | 1          | 0          | 0          | 0          | 0          | 0          | 0          |
| OBLIGATE AQUATIC PLANTS                     |            |            |            |            |            |            |            |            |            |            |
| <u>Brasenia schreberi</u>                   | 0          | 0          | 0          | 0          | 2          | 0          | 0          | 16         | 0          | 0          |
| <u>Decodon verticillatus</u>                | 0          | 0          | 0          | 0          | 0          | 0          | 0          | 0          | 0          | 0          |
| <u>Isoetes</u>                              | 0          | 0          | 0          | 0          | 0          | 0          | 0          | 0          | 0          | 0          |
| <u>Jussiaea</u>                             | 0          | 0          | 0          | 3          | 0          | 0          | 0          | 0          | 0          | 0          |
| <u>Nuphar</u>                               | 13         | 7          | 11         | 3          | 9          | 4          | 0          | 0          | 0          | 0          |
| <u>Nymphaea</u>                             | 4          | 5          | 11         | 0          | 15         | 0          | 21         | 0          | 0          | 0          |
| <u>Nymphoides</u>                           | 0          | 0          | 0          | 0          | 1          | 0          | 0          | 0          | 0          | 0          |
| <u>Potamogeton</u> (subgenus Coleogeton)    | 0          | 0          | 0          | 1          | 0          | 0          | 0          | 0          | 0          | 0          |
| <u>Potamogeton</u> (subgenus Eupotamogeton) | 0          | 0          | 2          | 1          | 4          | 1          | 0          | 5          | 0          | 0          |
| <u>Polygonum hydropiper</u> type            | 0          | 0          | 0          | 0          | 0          | 0          | 0          | 0          | 1          | 0          |
| <u>Sagittaria</u>                           | 1          | 1          | 0          | 2          | 0          | 0          | 1          | 0          | 0          | 2          |
| <u>Sparganium</u> type                      | 0          | 0          | 0          | 0          | 0          | 0          | 0          | 0          | 0          | 0          |
| <u>Sphagnum</u>                             | 0          | 0          | 0          | 0          | 0          | 0          | 0          | 0          | 0          | 0          |
| <u>Utricularia</u>                          | 0          | 0          | 0          | 1          | 0          | 0          | 1          | 0          | 0          | 0          |
| TOTAL DETERIORATED GRAINS                   | 5          | 8          | 4          | 3          | 6          | 7          | 2          | 11         | 17         | 11         |
| TOTAL EUCALYPTUS GRAINS TALLIED             | 281        | 396        | 226        | 127        | 279        | 133        | 236        | 361        | 120        | 187        |
| NUMBER OF EUCALYPTUS TABLETS                | 3          | 3          | 3          | 2          | 3          | 2          | 3          | 6          | 5          | 6          |
| DRY WEIGHT (g) OF EUCALYPTUS TABLETS        | 0.267      | 0.272      | 0.263      | 0.176      | 0.278      | 0.169      | 0.257      | 0.503      | 0.433      | 0.521      |

Pollen and Spore TypesSample Depth (cm)

|                                              | <u>580</u> | <u>590</u> | <u>600</u> | <u>610</u> | <u>620</u> | <u>630</u> | <u>640</u> | <u>650</u> | <u>660</u> | <u>670</u> |
|----------------------------------------------|------------|------------|------------|------------|------------|------------|------------|------------|------------|------------|
| TREES                                        |            |            |            |            |            |            |            |            |            |            |
| <u>Acer negundo</u>                          | 0          | 0          | 0          | 0          | 0          | 0          | 0          | 0          | 1          | 0          |
| <u>Acer rubrum</u>                           | 0          | 0          | 0          | 0          | 0          | 1          | 0          | 0          | 0          | 0          |
| <u>Acer saccharum</u>                        | 2          | 3          | 1          | 1          | 2          | 0          | 0          | 4          | 1          | 2          |
| <u>Acer saccharinum</u>                      | 0          | 0          | 0          | 1          | 0          | 0          | 0          | 2          | 0          | 0          |
| <u>Acer spicatum</u>                         | 0          | 2          | 0          | 0          | 0          | 1          | 0          | 0          | 0          | 0          |
| <u>Acer pensylvanicum</u>                    | 0          | 0          | 0          | 0          | 0          | 2          | 0          | 0          | 0          | 1          |
| <u>Betula</u>                                | 3          | 1          | 1          | 3          | 4          | 1          | 0          | 5          | 1          | 1          |
| <u>Carpinus/Ostrya type</u>                  | 17         | 25         | 21         | 18         | 11         | 21         | 19         | 21         | 19         | 16         |
| <u>Carya</u>                                 | 40         | 44         | 47         | 31         | 37         | 36         | 35         | 37         | 50         | 52         |
| <u>Castanea</u>                              | 1          | 0          | 0          | 0          | 0          | 0          | 0          | 1          | 0          | 0          |
| <u>Celtis/Maclura type</u>                   | 6          | 2          | 0          | 3          | 2          | 2          | 3          | 3          | 0          | 3          |
| <u>Cornus alternifolia type</u>              | 0          | 0          | 0          | 0          | 0          | 0          | 0          | 0          | 0          | 0          |
| <u>Cornus florida</u>                        | 0          | 0          | 0          | 0          | 0          | 0          | 0          | 1          | 0          | 0          |
| <u>Cupressaceae undiff.</u>                  | 9          | 12         | 12         | 22         | 25         | 19         | 13         | 19         | 24         | 19         |
| <u>Ericaceae (individual grains)</u>         | 0          | 0          | 0          | 0          | 0          | 0          | 0          | 0          | 4          | 0          |
| <u>Fagus grandifolia</u>                     | 126        | 117        | 109        | 104        | 112        | 99         | 120        | 118        | 129        | 125        |
| <u>Fraxinus undiff.</u>                      | 2          | 9          | 4          | 2          | 10         | 2          | 5          | 6          | 7          | 6          |
| <u>Fraxinus quadrangulata-nigra type</u>     | 4          | 3          | 7          | 0          | 10         | 0          | 11         | 4          | 8          | 0          |
| <u>Fraxinus pennsylvanica-americana type</u> | 4          | 6          | 3          | 4          | 4          | 5          | 0          | 0          | 1          | 1          |
| <u>Fraxinus C3stp type</u>                   | 1          | 4          | 2          | 1          | 2          | 0          | 5          | 2          | 5          | 4          |
| <u>Ilex type</u>                             | 0          | 0          | 2          | 1          | 0          | 0          | 4          | 1          | 5          | 0          |
| <u>Juglans cinerea</u>                       | 1          | 1          | 2          | 2          | 0          | 4          | 1          | 0          | 2          | 2          |
| <u>Juglans undiff.</u>                       | 0          | 0          | 1          | 0          | 1          | 0          | 0          | 0          | 1          | 0          |
| <u>Juglans nigra</u>                         | 0          | 0          | 2          | 1          | 0          | 0          | 0          | 1          | 0          | 1          |
| <u>Liquidambar styraciflua</u>               | 1          | 0          | 1          | 0          | 0          | 1          | 3          | 0          | 2          | 0          |
| <u>Liriodendron tulipifera</u>               | 0          | 0          | 0          | 0          | 0          | 0          | 0          | 0          | 0          | 0          |
| <u>Magnolia acuminata</u>                    | 0          | 0          | 0          | 0          | 0          | 0          | 0          | 0          | 0          | 0          |
| <u>Morus</u>                                 | 0          | 0          | 0          | 0          | 0          | 0          | 0          | 1          | 0          | 0          |
| <u>Nyssa</u>                                 | 0          | 0          | 0          | 0          | 0          | 0          | 1          | 0          | 0          | 1          |



Pollen and Spore TypesSample Depth (cm)

|                                             | <u>580</u> | <u>590</u> | <u>600</u> | <u>610</u> | <u>620</u> | <u>630</u> | <u>640</u> | <u>650</u> | <u>660</u> | <u>670</u> |
|---------------------------------------------|------------|------------|------------|------------|------------|------------|------------|------------|------------|------------|
| <u>Bidens</u> type                          | 0          | 1          | 1          | 0          | 1          | 0          | 0          | 1          | 0          | 1          |
| <u>Iva ciliata</u> type                     | 0          | 0          | 0          | 0          | 0          | 0          | 0          | 0          | 0          | 0          |
| <u>Cruciferae</u>                           | 0          | 0          | 0          | 1          | 0          | 0          | 0          | 0          | 0          | 0          |
| <u>Cyperaceae</u>                           | 0          | 0          | 0          | 4          | 1          | 1          | 0          | 2          | 1          | 1          |
| <u>Gramineae</u> (wild)                     | 1          | 1          | 2          | 2          | 2          | 2          | 2          | 2          | 0          | 0          |
| <u>Humulus/Cannabis</u> type                | 0          | 0          | 1          | 0          | 0          | 0          | 2          | 0          | 0          | 0          |
| <u>Mentha</u> type                          | 0          | 0          | 0          | 0          | 0          | 0          | 0          | 0          | 0          | 0          |
| <u>Plantago</u> undiff.                     | 0          | 0          | 0          | 0          | 0          | 0          | 0          | 0          | 0          | 0          |
| <u>Thalictrum</u>                           | 0          | 0          | 0          | 0          | 0          | 0          | 0          | 0          | 0          | 0          |
| <u>Urtica</u>                               | 0          | 0          | 1          | 0          | 0          | 0          | 0          | 0          | 0          | 0          |
| FERNS & FERN ALLIES                         |            |            |            |            |            |            |            |            |            |            |
| <u>Dryopteris</u> type                      | 0          | 0          | 0          | 0          | 0          | 1          | 0          | 0          | 0          | 0          |
| <u>Osmunda cinnamomea</u> type              | 0          | 0          | 0          | 0          | 0          | 0          | 0          | 0          | 0          | 0          |
| <u>Osmunda regalis</u> type                 | 0          | 0          | 0          | 0          | 0          | 0          | 0          | 0          | 0          | 0          |
| <u>Pteridium aquilinum</u>                  | 0          | 0          | 0          | 0          | 0          | 0          | 0          | 0          | 0          | 1          |
| Trilete spores undiff.                      | 0          | 0          | 0          | 0          | 0          | 0          | 0          | 0          | 0          | 0          |
| <u>Lycopodium clavatum</u> type             | 0          | 0          | 0          | 0          | 0          | 0          | 0          | 0          | 0          | 0          |
| UNKNOWN                                     | 0          | 0          | 0          | 0          | 0          | 0          | 0          | 0          | 0          | 0          |
| OBLIGATE AQUATIC PLANTS                     |            |            |            |            |            |            |            |            |            |            |
| <u>Brasenia schreberi</u>                   | 0          | 0          | 0          | 0          | 0          | 0          | 0          | 0          | 0          | 0          |
| <u>Decodon verticillatus</u>                | 0          | 0          | 0          | 0          | 0          | 0          | 0          | 0          | 0          | 0          |
| <u>Isoetes</u>                              | 0          | 0          | 0          | 0          | 0          | 0          | 0          | 3          | 0          | 0          |
| <u>Jussiaea</u>                             | 0          | 0          | 0          | 0          | 0          | 0          | 0          | 0          | 0          | 0          |
| <u>Nuphar</u>                               | 0          | 0          | 0          | 2          | 0          | 0          | 0          | 0          | 0          | 0          |
| <u>Nymphaea</u>                             | 0          | 0          | 0          | 0          | 0          | 0          | 0          | 0          | 0          | 0          |
| <u>Nymphoides</u>                           | 0          | 0          | 0          | 0          | 0          | 0          | 0          | 0          | 0          | 0          |
| <u>Potamogeton</u> (subgenus Coleogeton)    | 0          | 0          | 0          | 0          | 0          | 0          | 0          | 0          | 0          | 1          |
| <u>Potamogeton</u> (subgenus Eupotamogeton) | 0          | 0          | 0          | 0          | 0          | 0          | 0          | 1          | 0          | 0          |
| <u>Polygonum hydropiper</u> type            | 0          | 0          | 0          | 1          | 0          | 0          | 0          | 0          | 0          | 2          |
| <u>Sagittaria</u>                           | 0          | 1          | 0          | 1          | 1          | 0          | 0          | 2          | 2          | 0          |
| <u>Sparganium</u> type                      | 0          | 0          | 0          | 0          | 0          | 0          | 0          | 0          | 0          | 0          |
| <u>Sphagnum</u>                             | 0          | 0          | 1          | 0          | 0          | 0          | 0          | 0          | 0          | 0          |
| <u>Utricularia</u>                          | 0          | 0          | 0          | 0          | 0          | 0          | 0          | 0          | 0          | 0          |
| TOTAL DETERIORATED GRAINS                   | 11         | 11         | 5          | 15         | 11         | 12         | 12         | 7          | 11         | 15         |
| TOTAL EUCALYPTUS GRAINS TALLIED             | 44         | 131        | 148        | 124        | 184        | 215        | 254        | 46         | 213        | 168        |
| NUMBER OF EUCALYPTUS TABLETS                | 2          | 6          | 6          | 5          | 6          | 6          | 6          | 2          | 6          | 6          |
| DRY WEIGHT (g) OF EUCALYPTUS TABLETS        | 0.170      | 0.553      | 0.522      | 0.463      | 0.517      | 0.519      | 0.538      | 0.176      | 0.535      | 0.529      |



Pollen and Spore TypesSample Depth (cm)

|                                              | <u>680</u> | <u>690</u> | <u>700</u> | <u>710</u> | <u>720</u> | <u>730</u> | <u>740</u> | <u>750</u> | <u>760</u> | <u>766</u> |
|----------------------------------------------|------------|------------|------------|------------|------------|------------|------------|------------|------------|------------|
| TREES                                        |            |            |            |            |            |            |            |            |            |            |
| <u>Acer negundo</u>                          | 0          | 0          | 0          | 0          | 0          | 0          | 0          | 0          | 2          | 0          |
| <u>Acer rubrum</u>                           | 0          | 0          | 0          | 0          | 0          | 0          | 0          | 0          | 0          | 0          |
| <u>Acer saccharum</u>                        | 1          | 3          | 0          | 3          | 0          | 5          | 1          | 0          | 2          | 2          |
| <u>Acer saccharinum</u>                      | 0          | 0          | 0          | 0          | 0          | 0          | 0          | 0          | 0          | 0          |
| <u>Acer spicatum</u>                         | 0          | 0          | 0          | 0          | 0          | 0          | 0          | 0          | 0          | 0          |
| <u>Acer pensylvanicum</u>                    | 0          | 0          | 0          | 0          | 0          | 1          | 0          | 0          | 0          | 0          |
| <u>Betula</u>                                | 0          | 1          | 1          | 1          | 2          | 6          | 2          | 0          | 1          | 2          |
| <u>Carpinus/Ostrya type</u>                  | 14         | 13         | 25         | 14         | 12         | 15         | 21         | 14         | 25         | 28         |
| <u>Carya</u>                                 | 35         | 37         | 28         | 34         | 52         | 40         | 48         | 57         | 47         | 35         |
| <u>Castanea</u>                              | 0          | 0          | 0          | 0          | 0          | 0          | 0          | 0          | 0          | 0          |
| <u>Celtis/Maclura type</u>                   | 2          | 2          | 0          | 7          | 5          | 2          | 4          | 3          | 4          | 2          |
| <u>Cornus alternifolia type</u>              | 0          | 0          | 0          | 0          | 0          | 0          | 0          | 0          | 0          | 0          |
| <u>Cornus florida</u>                        | 0          | 0          | 1          | 0          | 0          | 0          | 0          | 0          | 0          | 0          |
| <u>Cupressaceae undiff.</u>                  | 16         | 20         | 14         | 14         | 11         | 32         | 42         | 42         | 49         | 44         |
| <u>Ericaceae (individual grains)</u>         | 0          | 0          | 0          | 0          | 0          | 0          | 0          | 0          | 0          | 0          |
| <u>Fagus grandifolia</u>                     | 151        | 112        | 108        | 123        | 121        | 57         | 50         | 35         | 19         | 28         |
| <u>Fraxinus undiff.</u>                      | 4          | 5          | 5          | 7          | 13         | 7          | 6          | 4          | 9          | 5          |
| <u>Fraxinus quadrangulata-nigra type</u>     | 3          | 2          | 2          | 5          | 3          | 2          | 3          | 0          | 2          | 1          |
| <u>Fraxinus pennsylvanica-americana type</u> | 1          | 3          | 7          | 2          | 3          | 2          | 3          | 6          | 4          | 2          |
| <u>Fraxinus C3stp type</u>                   | 1          | 5          | 3          | 2          | 4          | 0          | 1          | 4          | 1          | 4          |
| <u>Ilex type</u>                             | 2          | 0          | 1          | 1          | 0          | 0          | 0          | 0          | 0          | 2          |
| <u>Juglans cinerea</u>                       | 2          | 1          | 1          | 0          | 0          | 4          | 3          | 2          | 0          | 0          |
| <u>Juglans undiff.</u>                       | 0          | 0          | 0          | 1          | 0          | 0          | 1          | 2          | 2          | 1          |
| <u>Juglans nigra</u>                         | 1          | 0          | 4          | 0          | 1          | 1          | 0          | 0          | 0          | 0          |
| <u>Liquidambar styraciflua</u>               | 0          | 0          | 0          | 1          | 0          | 2          | 0          | 0          | 0          | 0          |
| <u>Liriodendron tulipifera</u>               | 0          | 0          | 0          | 0          | 0          | 0          | 0          | 0          | 0          | 0          |
| <u>Magnolia acuminata</u>                    | 0          | 0          | 0          | 0          | 0          | 0          | 0          | 0          | 0          | 0          |
| <u>Morus</u>                                 | 0          | 0          | 0          | 0          | 0          | 0          | 0          | 0          | 0          | 0          |
| <u>Nyssa</u>                                 | 0          | 1          | 0          | 2          | 0          | 0          | 0          | 0          | 0          | 1          |



Pollen and Spore TypesSample Depth (cm)

|                                             | <u>680</u> | <u>690</u> | <u>700</u> | <u>710</u> | <u>720</u> | <u>730</u> | <u>740</u> | <u>750</u> | <u>760</u> | <u>766</u> |
|---------------------------------------------|------------|------------|------------|------------|------------|------------|------------|------------|------------|------------|
| <u>Bidens</u> type                          | 1          | 1          | 0          | 0          | 0          | 1          | 0          | 0          | 0          | 0          |
| <u>Iva ciliata</u> type                     | 0          | 0          | 0          | 0          | 0          | 0          | 0          | 0          | 0          | 0          |
| <u>Cruciferae</u>                           | 0          | 0          | 0          | 0          | 0          | 3          | 0          | 2          | 0          | 1          |
| <u>Cyperaceae</u>                           | 2          | 0          | 2          | 1          | 3          | 1          | 0          | 1          | 0          | 1          |
| <u>Gramineae</u> (wild)                     | 2          | 0          | 5          | 3          | 0          | 2          | 2          | 1          | 2          | 5          |
| <u>Humulus/Cannabis</u> type                | 0          | 0          | 0          | 0          | 0          | 0          | 0          | 0          | 0          | 0          |
| <u>Mentha</u> type                          | 0          | 0          | 0          | 0          | 0          | 0          | 0          | 0          | 0          | 0          |
| <u>Plantago</u> undiff.                     | 0          | 0          | 0          | 0          | 0          | 0          | 0          | 0          | 0          | 0          |
| <u>Thalictrum</u>                           | 1          | 0          | 0          | 1          | 0          | 0          | 0          | 0          | 1          | 0          |
| <u>Urtica</u>                               | 1          | 0          | 0          | 0          | 0          | 0          | 0          | 0          | 0          | 0          |
| FERNS & FERN ALLIES                         |            |            |            |            |            |            |            |            |            |            |
| <u>Dryopteris</u> type                      | 0          | 0          | 0          | 0          | 0          | 0          | 0          | 0          | 1          | 0          |
| <u>Osmunda cinnamomea</u> type              | 0          | 0          | 0          | 0          | 0          | 0          | 0          | 1          | 0          | 2          |
| <u>Osmunda regalis</u> type                 | 0          | 0          | 0          | 0          | 0          | 0          | 0          | 0          | 0          | 0          |
| <u>Pteridium aquilinum</u>                  | 0          | 0          | 0          | 0          | 0          | 0          | 0          | 0          | 0          | 0          |
| Trilete spores undiff.                      | 0          | 0          | 0          | 0          | 0          | 0          | 0          | 0          | 0          | 0          |
| <u>Lycopodium clavatum</u> type             | 0          | 0          | 0          | 0          | 0          | 0          | 0          | 0          | 0          | 0          |
| UNKNOWN                                     | 0          | 0          | 0          | 0          | 0          | 1          | 0          | 0          | 0          | 1          |
| OBLIGATE AQUATIC PLANTS                     |            |            |            |            |            |            |            |            |            |            |
| <u>Brasenia schreberi</u>                   | 0          | 0          | 0          | 0          | 0          | 0          | 0          | 0          | 0          | 0          |
| <u>Decodon verticillatus</u>                | 0          | 1          | 0          | 0          | 0          | 0          | 0          | 0          | 0          | 0          |
| <u>Isoetes</u>                              | 0          | 0          | 0          | 0          | 0          | 0          | 0          | 0          | 0          | 2          |
| <u>Jussiaea</u>                             | 0          | 0          | 0          | 0          | 0          | 0          | 0          | 0          | 0          | 0          |
| <u>Nuphar</u>                               | 0          | 0          | 0          | 0          | 0          | 0          | 0          | 0          | 0          | 1          |
| <u>Nymphaea</u>                             | 0          | 0          | 0          | 0          | 0          | 0          | 0          | 0          | 0          | 0          |
| <u>Nymphoides</u>                           | 0          | 0          | 0          | 0          | 0          | 0          | 0          | 0          | 0          | 0          |
| <u>Potamogeton</u> (subgenus Coleogeton)    | 0          | 0          | 0          | 0          | 0          | 0          | 0          | 0          | 0          | 0          |
| <u>Potamogeton</u> (subgenus Eupotamogeton) | 0          | 1          | 1          | 1          | 0          | 0          | 0          | 0          | 1          | 0          |
| <u>Polygonum hydropiper</u> type            | 0          | 0          | 0          | 0          | 0          | 0          | 0          | 0          | 0          | 0          |
| <u>Sagittaria</u>                           | 0          | 0          | 0          | 0          | 1          | 0          | 0          | 0          | 0          | 0          |
| <u>Sparganium</u> type                      | 0          | 0          | 0          | 0          | 0          | 0          | 0          | 0          | 0          | 0          |
| <u>Sphagnum</u>                             | 0          | 0          | 0          | 0          | 0          | 0          | 0          | 0          | 0          | 0          |
| <u>Utricularia</u>                          | 0          | 0          | 0          | 0          | 0          | 0          | 0          | 0          | 0          | 0          |
| TOTAL DETERIORATED GRAINS                   | 14         | 13         | 12         | 14         | 8          | 11         | 19         | 16         | 4          | 10         |
| TOTAL EUCALYPTUS GRAINS TALLIED             | 170        | 191        | 37         | 165        | 107        | 142        | 190        | 124        | 148        | 76         |
| NUMBER OF EUCALYPTUS TABLETS                | 5          | 6          | 2          | 6          | 6          | 4          | 4          | 4          | 4          | 2          |
| DRY WEIGHT (g) OF EUCALYPTUS TABLETS        | 0.469      | 0.514      | 0.169      | 0.555      | 0.562      | 0.358      | 0.367      | 0.345      | 0.361      | 0.186      |

TABLE 2

POLLEN INFLUX VALUES FOR SELECTED TAXA IN SEDIMENT CORE 79B, CAHABA POND, ST. CLAIR COUNTY, ALABAMA

| <u>Pollen Types</u>                   | <u>Sample Depth (cm)</u> |            |            |            |            |            |            |            |            |            |            |            |
|---------------------------------------|--------------------------|------------|------------|------------|------------|------------|------------|------------|------------|------------|------------|------------|
|                                       | <u>134</u>               | <u>140</u> | <u>150</u> | <u>160</u> | <u>170</u> | <u>180</u> | <u>190</u> | <u>200</u> | <u>232</u> | <u>240</u> | <u>250</u> | <u>260</u> |
| <u>Cupressaceae undiff.</u>           | 0                        | 85         | 0          | 0          | 0          | 0          | 0          | 0          | 8          | 0          | 0          | 0          |
| <u>Taxodium</u>                       | 0                        | 17         | 0          | 0          | 0          | 0          | 0          | 0          | 0          | 0          | 0          | 27         |
| <u>Acer negundo</u>                   | 0                        | 0          | 0          | 0          | 0          | 0          | 0          | 0          | 0          | 0          | 0          | 0          |
| <u>Acer rubrum</u>                    | 0                        | 0          | 35         | 52         | 0          | 0          | 0          | 0          | 4          | 0          | 116        | 53         |
| <u>Nyssa</u>                          | 4148                     | 2265       | 5648       | 5380       | 11,165     | 8125       | 11,616     | 7935       | 523        | 2623       | 163        | 53         |
| <u>Fagus grandifolia</u>              | 56                       | 34         | 71         | 0          | 62         | 119        | 50         | 27         | 4          | 66         | 0          | 0          |
| <u>Ostrya/Carpinus</u>                | 28                       | 0          | 106        | 26         | 0          | 40         | 0          | 0          | 4          | 0          | 46         | 0          |
| <u>Ulmus</u>                          | 28                       | 17         | 71         | 0          | 0          | 0          | 50         | 0          | 8          | 16         | 186        | 213        |
| <u>Fraxinus</u>                       | 113                      | 51         | 141        | 312        | 62         | 319        | 151        | 53         | 24         | 82         | 139        | 267        |
| <u>Betula</u>                         | 0                        | 0          | 0          | 0          | 123        | 0          | 50         | 0          | 8          | 16         | 0          | 0          |
| <u>Tsuga</u>                          | 0                        | 0          | 0          | 0          | 0          | 0          | 0          | 0          | 0          | 0          | 0          | 0          |
| <u>Magnolia acuminata</u>             | 56                       | 0          | 0          | 52         | 0          | 0          | 0          | 0          | 0          | 0          | 0          | 0          |
| <u>Carya</u>                          | 198                      | 68         | 141        | 234        | 493        | 239        | 302        | 240        | 36         | 98         | 395        | 533        |
| <u>Quercus</u>                        | 2371                     | 1311       | 2930       | 1741       | 4256       | 4620       | 4324       | 2805       | 296        | 1213       | 5223       | 5917       |
| <u>Pinus undiff.</u>                  | 1185                     | 1065       | 1571       | 1495       | 1573       | 1653       | 1433       | 1349       | 144        | 402        | 464        | 626        |
| <u>Diploxylon Pinus</u>               | 198                      | 170        | 194        | 182        | 247        | 239        | 302        | 214        | 16         | 82         | 279        | 120        |
| <u>Haploxylon Pinus</u>               | 0                        | 0          | 0          | 0          | 0          | 0          | 101        | 0          | 4          | 0          | 0          | 0          |
| <u>Castanea</u>                       | 310                      | 204        | 353        | 156        | 617        | 518        | 805        | 214        | 12         | 82         | 46         | 27         |
| <u>Liquidambar styraciflua</u>        | 226                      | 221        | 353        | 286        | 555        | 597        | 503        | 508        | 61         | 148        | 46         | 53         |
| <u>Alnus rugosa type</u>              | 0                        | 0          | 0          | 26         | 0          | 0          | 0          | 0          | 4          | 0          | 0          | 0          |
| <u>Cephalanthus occidentalis</u>      | 282                      | 204        | 0          | 104        | 0          | 119        | 251        | 27         | 28         | 0          | 186        | 240        |
| <u>Rubus</u>                          | 0                        | 0          | 0          | 26         | 123        | 0          | 50         | 0          | 0          | 0          | 1555       | 2692       |
| <u>Osmunda</u>                        | 28                       | 0          | 0          | 52         | 0          | 40         | 0          | 0          | 0          | 0          | 46         | 267        |
| <u>Tubuliflorae undiff.</u>           | 0                        | 17         | 0          | 52         | 0          | 0          | 50         | 0          | 4          | 49         | 163        | 133        |
| <u>Ambrosia type</u>                  | 56                       | 119        | 71         | 78         | 0          | 119        | 50         | 27         | 16         | 0          | 0          | 27         |
| <u>Gramineae</u>                      | 56                       | 17         | 106        | 56         | 123        | 40         | 50         | 27         | 20         | 98         | 418        | 346        |
| <u>Cyperaceae</u>                     | 0                        | 0          | 0          | 0          | 0          | 0          | 101        | 0          | 8          | 49         | 23         | 53         |
| TOTAL POLLEN INFLUX<br>OF UPLAND TAXA | 9482                     | 6021       | 12,002     | 10,410     | 20,017     | 16,828     | 20,441     | 13,639     | 1331       | 5222       | 10,354     | 12,100     |

| <u>Pollen Types</u>                   | <u>Sample Depth (cm)</u> |            |            |            |            |            |            |            |            |            |            |
|---------------------------------------|--------------------------|------------|------------|------------|------------|------------|------------|------------|------------|------------|------------|
|                                       | <u>270</u>               | <u>280</u> | <u>290</u> | <u>300</u> | <u>320</u> | <u>330</u> | <u>340</u> | <u>350</u> | <u>360</u> | <u>370</u> | <u>380</u> |
| <u>Cupressaceae undiff.</u>           | 0                        | 0          | 31         | 0          | 32         | 46         | 13         | 71         | 0          | 0          | 0          |
| <u>Taxodium</u>                       | 0                        | 0          | 0          | 0          | 0          | 0          | 0          | 71         | 0          | 0          | 0          |
| <u>Acer negundo</u>                   | 0                        | 0          | 15         | 0          | 0          | 23         | 47         | 0          | 50         | 0          | 68         |
| <u>Acer rubrum</u>                    | 25                       | 22         | 170        | 29         | 48         | 46         | 51         | 635        | 552        | 1033       | 1016       |
| <u>Nyssa</u>                          | 50                       | 43         | 170        | 14         | 355        | 0          | 8          | 71         | 0          | 57         | 203        |
| <u>Fagus grandifolia</u>              | 38                       | 54         | 170        | 39         | 129        | 91         | 13         | 71         | 50         | 172        | 135        |
| <u>Ostrya/Carpinus</u>                | 38                       | 11         | 46         | 14         | 48         | 69         | 17         | 141        | 201        | 115        | 68         |
| <u>Ulmus</u>                          | 126                      | 97         | 108        | 24         | 97         | 137        | 30         | 212        | 100        | 115        | 474        |
| <u>Fraxinus</u>                       | 25                       | 108        | 170        | 145        | 161        | 823        | 72         | 988        | 50         | 172        | 745        |
| <u>Betula</u>                         | 0                        | 11         | 0          | 0          | 48         | 0          | 8          | 71         | 50         | 402        | 68         |
| <u>Tsuga</u>                          | 0                        | 0          | 15         | 0          | 32         | 0          | 0          | 0          | 0          | 0          | 68         |
| <u>Magnolia acuminata</u>             | 0                        | 0          | 0          | 0          | 0          | 0          | 0          | 71         | 0          | 0          | 68         |
| <u>Carya</u>                          | 251                      | 130        | 494        | 77         | 306        | 320        | 102        | 2116       | 1757       | 1320       | 1355       |
| <u>Quercus</u>                        | 2939                     | 2191       | 2841       | 944        | 2804       | 5258       | 923        | 15,520     | 10,793     | 12,052     | 14,428     |
| <u>Pinus undiff.</u>                  | 170                      | 119        | 193        | 36         | 250        | 217        | 38         | 635        | 803        | 775        | 508        |
| <u>Diploxylon Pinus</u>               | 38                       | 11         | 77         | 29         | 81         | 34         | 13         | 0          | 251        | 143        | 68         |
| <u>Haploxylon Pinus</u>               | 0                        | 0          | 0          | 0          | 0          | 0          | 0          | 0          | 50         | 57         | 0          |
| <u>Castanea</u>                       | 25                       | 65         | 0          | 5          | 48         | 69         | 0          | 705        | 50         | 918        | 948        |
| <u>Liquidambar styraciflua</u>        | 25                       | 22         | 46         | 29         | 113        | 46         | 8          | 0          | 50         | 57         | 0          |
| <u>Alnus rugosa type</u>              | 0                        | 0          | 0          | 14         | 16         | 23         | 4          | 141        | 0          | 115        | 406        |
| <u>Cephalanthus occidentalis</u>      | 214                      | 119        | 432        | 111        | 387        | 1257       | 106        | 71         | 351        | 230        | 203        |
| <u>Rubus</u>                          | 565                      | 0          | 432        | 0          | 306        | 0          | 4          | 0          | 0          | 0          | 0          |
| <u>Osmunda</u>                        | 1294                     | 345        | 726        | 53         | 48         | 274        | 25         | 353        | 151        | 402        | 406        |
| <u>Tubuliflorae undiff.</u>           | 25                       | 11         | 15         | 0          | 81         | 46         | 8          | 0          | 100        | 115        | 68         |
| <u>Ambrosia type</u>                  | 25                       | 22         | 0          | 5          | 32         | 0          | 8          | 141        | 50         | 230        | 0          |
| <u>Gramineae</u>                      | 100                      | 76         | 62         | 43         | 97         | 69         | 8          | 564        | 402        | 402        | 406        |
| <u>Cyperaceae</u>                     | 163                      | 11         | 139        | 5          | 64         | 412        | 4          | 71         | 402        | 172        | 406        |
| TOTAL POLLEN INFLUX<br>OF UPLAND TAXA | 6450                     | 3831       | 6524       | 1717       | 5955       | 9373       | 1541       | 23,139     | 17,018     | 19,570     | 22,658     |

| <u>Pollen Types</u>                   | <u>Sample Depth (cm)</u> |            |            |            |            |            |            |            |            |            |            |
|---------------------------------------|--------------------------|------------|------------|------------|------------|------------|------------|------------|------------|------------|------------|
|                                       | <u>390</u>               | <u>400</u> | <u>410</u> | <u>420</u> | <u>430</u> | <u>440</u> | <u>450</u> | <u>460</u> | <u>470</u> | <u>480</u> | <u>520</u> |
| Cupressaceae undiff.                  | 269                      | 71         | 64         | 0          | 100        | 195        | 89         | 21         | 36         | 129        | 62         |
| Taxodium                              | 0                        | 0          | 0          | 0          | 0          | 0          | 0          | 0          | 0          | 173        | 0          |
| Acer negundo                          | 202                      | 71         | 191        | 86         | 200        | 586        | 0          | 21         | 36         | 0          | 0          |
| Acer rubrum                           | 942                      | 499        | 763        | 2146       | 2101       | 1856       | 680        | 64         | 217        | 129        | 31         |
| Nyssa                                 | 0                        | 285        | 127        | 86         | 100        | 0          | 0          | 0          | 0          | 0          | 589        |
| Fagus grandifolia                     | 135                      | 285        | 64         | 172        | 400        | 293        | 30         | 21         | 145        | 129        | 124        |
| Ostrya/Carpinus                       | 135                      | 285        | 381        | 429        | 200        | 391        | 118        | 64         | 181        | 173        | 124        |
| Ulmus                                 | 471                      | 428        | 445        | 429        | 100        | 488        | 89         | 21         | 254        | 259        | 62         |
| Fraxinus                              | 1076                     | 357        | 508        | 172        | 1600       | 2051       | 325        | 257        | 580        | 259        | 527        |
| Betula                                | 135                      | 71         | 127        | 515        | 400        | 879        | 118        | 171        | 217        | 518        | 279        |
| Tsuga                                 | 135                      | 0          | 0          | 172        | 200        | 98         | 30         | 0          | 181        | 86         | 62         |
| Magnolia acuminata                    | 0                        | 0          | 127        | 86         | 200        | 195        | 0          | 43         | 435        | 216        | 341        |
| Carya                                 | 1615                     | 1355       | 1525       | 2576       | 1000       | 1074       | 621        | 299        | 616        | 1294       | 558        |
| Quercus                               | 12,446                   | 15,121     | 13,409     | 16,999     | 20,105     | 16,215     | 5177       | 4213       | 4348       | 5566       | 4157       |
| Pinus undiff.                         | 807                      | 1248       | 794        | 816        | 1250       | 1856       | 695        | 620        | 1594       | 2330       | 1753       |
| Diploxylon Pinus                      | 673                      | -          | 318        | 558        | 200        | 781        | 89         | 214        | 688        | 626        | 450        |
| Haploxylon Pinus                      | 0                        | 0          | 0          | 0          | 0          | 98         | 0          | 21         | 181        | 173        | 186        |
| Castanea                              | 1144                     | 642        | 191        | 2061       | 1700       | 1563       | 651        | 321        | 942        | 906        | 248        |
| Liquidambar styraciflua               | 67                       | 143        | 64         | 0          | 0          | 0          | 0          | 0          | 0          | 0          | 0          |
| Alnus rugosa type                     | 135                      | 0          | 127        | 343        | 300        | 195        | 118        | 107        | 181        | 216        | 279        |
| Cephalanthus occidentalis             | 1009                     | 71         | 254        | 429        | 300        | 0          | 148        | 150        | 72         | 129        | 186        |
| Rubus                                 | 67                       | 0          | 381        | 0          | 0          | 0          | 30         | 0          | 0          | 0          | 0          |
| Osmunda                               | 202                      | 285        | 381        | 172        | 1000       | 391        | 118        | 192        | 72         | 0          | 31         |
| Tubuliflorae undiff.                  | 67                       | 71         | 191        | 172        | 100        | 293        | 30         | 0          | 36         | 173        | 93         |
| Ambrosia type                         | 135                      | 214        | 64         | 601        | 300        | 391        | 118        | 150        | 217        | 173        | 217        |
| Gramineae                             | 202                      | 428        | 381        | 343        | 800        | 586        | 325        | 128        | 543        | 388        | 310        |
| Cyperaceae                            | 269                      | 214        | 254        | 172        | 400        | 391        | 237        | 21         | 109        | 777        | 403        |
| TOTAL POLLEN INFLUX<br>OF UPLAND TAXA | 22,738                   | 23,073     | 21,956     | 30,135     | 34,459     | 32,039     | 10,102     | 7249       | 12,282     | 15,381     | 11,478     |

| <u>Pollen Types</u>                   | <u>Sample Depth (cm)</u> |            |            |            |            |            |            |            |            |            |            |
|---------------------------------------|--------------------------|------------|------------|------------|------------|------------|------------|------------|------------|------------|------------|
|                                       | <u>530</u>               | <u>540</u> | <u>550</u> | <u>560</u> | <u>570</u> | <u>580</u> | <u>590</u> | <u>600</u> | <u>610</u> | <u>620</u> | <u>630</u> |
| Cupressaceae undiff.                  | 158                      | 271        | 304        | 258        | 133        | 829        | 1208       | 1009       | 1959       | 894        | 1094       |
| <u>Taxodium</u>                       | 0                        | 0          | 0          | 0          | 0          | 0          | 101        | 0          | 0          | 36         | 0          |
| <u>Acer negundo</u>                   | 119                      | 0          | 0          | 0          | 66         | 0          | 0          | 0          | 0          | 0          | 0          |
| <u>Acer rubrum</u>                    | 79                       | 136        | 0          | 0          | 0          | 0          | 0          | 0          | 0          | 0          | 58         |
| <u>Nyssa</u>                          | 0                        | 102        | 0          | 86         | 66         | 0          | 0          | 0          | 0          | 0          | 0          |
| <u>Fagus grandifolia</u>              | 277                      | 271        | 1215       | 11,876     | 8306       | 11,611     | 11,780     | 9169       | 9262       | 4007       | 5700       |
| <u>Ostrya/Carpinus</u>                | 158                      | 407        | 651        | 1463       | 1329       | 1567       | 2517       | 1767       | 1603       | 394        | 1209       |
| <u>Ulmus</u>                          | 396                      | 407        | 477        | 1205       | 598        | 1290       | 1107       | 1094       | 980        | 429        | 691        |
| <u>Fraxinus</u>                       | 237                      | 339        | 347        | 1205       | 930        | 1014       | 2215       | 1346       | 623        | 930        | 403        |
| <u>Betula</u>                         | 475                      | 339        | 130        | 430        | 0          | 276        | 101        | 84         | 267        | 143        | 58         |
| <u>Tsuga</u>                          | 198                      | 34         | 87         | 0          | 0          | 92         | 0          | 0          | 89         | 0          | 0          |
| <u>Magnolia acuminata</u>             | 356                      | 1085       | 1388       | 0          | 0          | 0          | 0          | 0          | 0          | 0          | 0          |
| <u>Carya</u>                          | 989                      | 610        | 1041       | 1635       | 3123       | 3686       | 4430       | 3954       | 2761       | 1324       | 2073       |
| <u>Quercus</u>                        | 5815                     | 5628       | 7461       | 6368       | 5914       | 9215       | 8155       | 7234       | 8104       | 3256       | 5297       |
| <u>Pinus</u> undiff.                  | 1167                     | 373        | 152        | 172        | 133        | 276        | 101        | 210        | 267        | 0          | 144        |
| <u>Diploxylon Pinus</u>               | 475                      | 0          | 0          | 0          | 66         | 92         | 0          | 84         | 0          | 72         | 0          |
| <u>Haploxylon Pinus</u>               | 732                      | 170        | 0          | 0          | 0          | 0          | 0          | 0          | 0          | 0          | 0          |
| <u>Castanea</u>                       | 158                      | 34         | 0          | 86         | 0          | 92         | 0          | 0          | 0          | 0          | 0          |
| <u>Liquidambar styraciflua</u>        | 0                        | 0          | 0          | 0          | 66         | 92         | 0          | 84         | 0          | 0          | 58         |
| <u>Alnus rugosa</u> type              | 198                      | 237        | 130        | 0          | 66         | 92         | 101        | 0          | 178        | 36         | 0          |
| <u>Cephalanthus occidentalis</u>      | 277                      | 68         | 130        | 0          | 0          | 0          | 0          | 0          | 0          | 0          | 0          |
| <u>Rubus</u>                          | 40                       | 0          | 0          | 0          | 0          | 92         | 0          | 0          | 0          | 0          | 0          |
| <u>Osmunda</u>                        | 198                      | 0          | 43         | 0          | 66         | 0          | 0          | 0          | 0          | 0          | 0          |
| <u>Tubuliflorae</u> undiff.           | 0                        | 136        | 174        | 86         | 0          | 92         | 101        | 336        | 267        | 250        | 230        |
| <u>Ambrosia</u> type                  | 237                      | 271        | 304        | 775        | 864        | 737        | 302        | 421        | 1336       | 250        | 173        |
| Gramineae                             | 673                      | 949        | 434        | 258        | 199        | 92         | 101        | 168        | 178        | 72         | 115        |
| Cyperaceae                            | 396                      | 136        | 174        | 172        | 66         | 0          | 0          | 0          | 356        | 36         | 58         |
| TOTAL POLLEN INFLUX<br>OF UPLAND TAXA | 14,321                   | 12,375     | 15,161     | 27,367     | 22,859     | 32,621     | 33,426     | 28,391     | 30,190     | 12,450     | 18,395     |

| <u>Pollen Types</u>                   | <u>Sample Depth (cm)</u> |            |            |            |            |            |            |            |            |            |
|---------------------------------------|--------------------------|------------|------------|------------|------------|------------|------------|------------|------------|------------|
|                                       | <u>640</u>               | <u>650</u> | <u>660</u> | <u>670</u> | <u>680</u> | <u>690</u> | <u>700</u> | <u>710</u> | <u>720</u> | <u>730</u> |
| Cupressaceae undiff.                  | 657                      | 2078       | 1723       | 1710       | 1262       | 1538       | 1828       | 1346       | 1651       | 2688       |
| <u>Taxodium</u>                       | 51                       | 328        | 574        | 0          | 315        | 0          | 0          | 96         | 0          | 0          |
| <u>Acer negundo</u>                   | 0                        | 0          | 72         | 0          | 0          | 0          | 0          | 0          | 0          | 0          |
| <u>Acer rubrum</u>                    | 0                        | 0          | 0          | 0          | 0          | 0          | 0          | 0          | 0          | 0          |
| <u>Nyssa</u>                          | 51                       | 0          | 0          | 90         | 0          | 77         | 0          | 192        | 0          | 0          |
| <u>Fagus grandifolia</u>              | 6062                     | 12,905     | 9262       | 11,251     | 11,908     | 8615       | 14,101     | 11,826     | 18,166     | 4788       |
| <u>Ostrya/Carpinus</u>                | 960                      | 2297       | 1364       | 1440       | 1104       | 1000       | 3264       | 1346       | 1802       | 1260       |
| <u>Ulmus</u>                          | 758                      | 875        | 1364       | 1530       | 946        | 1615       | 1828       | 1346       | 2853       | 1092       |
| <u>Fraxinus</u>                       | 1061                     | 1312       | 1508       | 990        | 710        | 1154       | 2220       | 1538       | 3453       | 924        |
| <u>Betula</u>                         | 0                        | 547        | 72         | 90         | 0          | 77         | 131        | 96         | 300        | 504        |
| <u>Tsuga</u>                          | 0                        | 0          | 0          | 0          | 0          | 0          | 0          | 0          | 0          | 0          |
| <u>Magnolia acuminata</u>             | 0                        | 0          | 0          | 0          | 0          | 0          | 0          | 0          | 0          | 0          |
| <u>Carya</u>                          | 1768                     | 4047       | 3590       | 4680       | 2760       | 2846       | 3656       | 3269       | 7807       | 3360       |
| <u>Quercus</u>                        | 4496                     | 7765       | 5241       | 6930       | 6072       | 7461       | 11,750     | 6442       | 13,062     | 9912       |
| <u>Pinus undiff.</u>                  | 0                        | 0          | 144        | 180        | 39         | 38         | 131        | 96         | 0          | 84         |
| <u>Diploxylon Pinus</u>               | 0                        | 109        | 0          | 180        | 0          | 0          | 0          | 0          | 150        | 84         |
| <u>Haploxylon Pinus</u>               | 0                        | 0          | 0          | 0          | 0          | 0          | 0          | 0          | 0          | 0          |
| <u>Castanea</u>                       | 0                        | 109        | 0          | 0          | 0          | 0          | 0          | 0          | 0          | 0          |
| <u>Liquidambar styraciflua</u>        | 152                      | 0          | 144        | 0          | 0          | 0          | 0          | 96         | 0          | 168        |
| <u>Alnus rugosa</u> type              | 0                        | 0          | 0          | 0          | 0          | 77         | 0          | 96         | 0          | 0          |
| <u>Cephalanthus occidentalis</u>      | 0                        | 0          | 0          | 90         | 0          | 0          | 0          | 0          | 0          | 0          |
| <u>Rubus</u>                          | 0                        | 109        | 0          | 0          | 0          | 0          | 0          | 0          | 0          | 0          |
| <u>Osmunda</u>                        | 0                        | 0          | 0          | 0          | 0          | 0          | 0          | 0          | 0          | 0          |
| <u>Tubuliflorae undiff.</u>           | 51                       | 328        | 72         | 540        | 79         | 0          | 392        | 96         | 300        | 252        |
| <u>Ambrosia</u> type                  | 303                      | 328        | 503        | 630        | 631        | 692        | 522        | 769        | 601        | 252        |
| <u>Gramineae</u>                      | 101                      | 219        | 0          | 0          | 158        | 0          | 653        | 288        | 0          | 168        |
| <u>Cyperaceae</u>                     | 101                      | 219        | 72         | 90         | 158        | 0          | 261        | 96         | 450        | 84         |
| TOTAL POLLEN INFLUX<br>OF UPLAND TAXA | 17,025                   | 35,653     | 27,139     | 32,222     | 27,482     | 26,192     | 41,910     | 30,671     | 51,646     | 27,636     |



| <u>Pollen Types</u>                   | <u>Sample Depth (cm)</u> |            |            |            |
|---------------------------------------|--------------------------|------------|------------|------------|
|                                       | <u>740</u>               | <u>750</u> | <u>760</u> | <u>766</u> |
| Cupressaceae undiff.                  | 2703                     | 3893       | 3982       | 3588       |
| <u>Taxodium</u>                       | 193                      | 0          | 0          | 0          |
| <u>Acer negundo</u>                   | 0                        | 0          | 163        | 0          |
| <u>Acer rubrum</u>                    | 0                        | 0          | 0          | 0          |
| <u>Nyssa</u>                          | 0                        | 0          | 0          | 82         |
| <u>Fagus grandifolia</u>              | 3218                     | 3244       | 1544       | 2283       |
| <u>Ostrya/Carpinus</u>                | 1351                     | 1298       | 2032       | 2283       |
| <u>Ulmus</u>                          | 837                      | 1483       | 488        | 815        |
| <u>Fraxinus</u>                       | 837                      | 1298       | 1300       | 978        |
| <u>Betula</u>                         | 129                      | 0          | 81         | 163        |
| <u>Tsuga</u>                          | 0                        | 0          | 0          | 0          |
| <u>Magnolia acuminata</u>             | 0                        | 0          | 0          | 0          |
| <u>Carya</u>                          | 3089                     | 5284       | 3820       | 2854       |
| <u>Quercus</u>                        | 8302                     | 12,144     | 13,653     | 10,356     |
| <u>Pinus undiff.</u>                  | 32                       | 93         | 203        | 204        |
| <u>Diploxylon Pinus</u>               | 0                        | 0          | 0          | 0          |
| <u>Haploxylon Pinus</u>               | 0                        | 0          | 0          | 0          |
| <u>Castanea</u>                       | 0                        | 0          | 0          | 0          |
| <u>Liquidambar styraciflua</u>        | 0                        | 0          | 0          | 0          |
| <u>Alnus rugosa</u> type              | 0                        | 0          | 0          | 82         |
| <u>Cephalanthus occidentalis</u>      | 0                        | 0          | 81         | 0          |
| <u>Rubus</u>                          | 0                        | 0          | 0          | 0          |
| <u>Osmunda</u>                        | 0                        | 93         | 0          | 163        |
| <u>Tubuliflorae undiff.</u>           | 708                      | 0          | 163        | 245        |
| <u>Ambrosia</u> type                  | 322                      | 556        | 81         | 326        |
| <u>Gramineae</u>                      | 129                      | 93         | 163        | 408        |
| <u>Cyperaceae</u>                     | 0                        | 93         | 0          | 82         |
| TOTAL POLLEN INFLUX<br>OF UPLAND TAXA | 22,428                   | 30,961     | 28,891     | 26,460     |

---

Values for pollen influx are expressed as number of grains deposited per cm<sup>2</sup> of sediment

TABLE 3

## MACROFOSSIL DATA FOR SEDIMENT CORE 79B, CAHABA POND, ST. CLAIR COUNTY, ALABAMA

| <u>Macrofossil Types</u>          | <u>Sample Depth (cm)</u>    |                             |                             |                             |                             |                             |                             |                             |                             |                             |
|-----------------------------------|-----------------------------|-----------------------------|-----------------------------|-----------------------------|-----------------------------|-----------------------------|-----------------------------|-----------------------------|-----------------------------|-----------------------------|
|                                   | <u>145 to</u><br><u>150</u> | <u>160 to</u><br><u>165</u> | <u>175 to</u><br><u>180</u> | <u>195 to</u><br><u>200</u> | <u>255 to</u><br><u>260</u> | <u>280 to</u><br><u>285</u> | <u>300 to</u><br><u>305</u> | <u>330 to</u><br><u>335</u> | <u>355 to</u><br><u>360</u> | <u>380 to</u><br><u>385</u> |
| <u>Fagus</u> leaves & petioles    | -                           | -                           | -                           | -                           | -                           | -                           | -                           | -                           | -                           | -                           |
| <u>Fagus</u> bud scales           | -                           | -                           | -                           | -                           | -                           | -                           | -                           | -                           | -                           | -                           |
| <u>Fagus</u> fruits               | -                           | -                           | -                           | -                           | -                           | -                           | -                           | -                           | -                           | -                           |
| Twigs & wood undiff.              | ++                          | +++                         | +++                         | +++                         | +++                         | ++                          | +++                         | ++                          | +                           | -                           |
| <u>Chamaecyparis thyoides</u>     |                             |                             |                             |                             |                             |                             |                             |                             |                             |                             |
| branchlets                        | 0                           | 0                           | 0                           | 0                           | 0                           | 0                           | 0                           | 0                           | 0                           | 0                           |
| <u>Pinus</u> seeds                | 0                           | 0                           | 0                           | 0                           | 0                           | 0                           | 0                           | 0                           | 0                           | 0                           |
| <u>Diploxylon Pinus</u>           |                             |                             |                             |                             |                             |                             |                             |                             |                             |                             |
| needle fragments                  | 118                         | 17                          | 2                           | 3                           | 0                           | 0                           | 0                           | 0                           | 0                           | 0                           |
| <u>Haploxylon Pinus</u>           |                             |                             |                             |                             |                             |                             |                             |                             |                             |                             |
| needle fragments                  | 0                           | 0                           | 0                           | 0                           | 0                           | 0                           | 0                           | 0                           | 0                           | 0                           |
| <u>Nyssa sylvatica</u> seeds      | 0                           | 1                           | 3                           | 7                           | 0                           | 0                           | 1                           | 0                           | 0                           | 0                           |
| <u>Quercus</u> acorns             | 0                           | 0                           | 0                           | 0                           | 1                           | 0                           | 0                           | 0                           | 0                           | 0                           |
| <u>Cephalanthus occidentalis</u>  |                             |                             |                             |                             |                             |                             |                             |                             |                             |                             |
| fruit heads                       | 0                           | 0                           | 0                           | 0                           | 0                           | 0                           | 0                           | 1                           | 0                           | 0                           |
| <u>Cephalanthus occidentalis</u>  |                             |                             |                             |                             |                             |                             |                             |                             |                             |                             |
| nutlets                           | 1                           | 0                           | 0                           | 1                           | 0                           | 1                           | 4                           | 12                          | 0                           | 2                           |
| <u>Cornus obliqua</u> seeds       | 0                           | 0                           | 0                           | 0                           | 0                           | 0                           | 0                           | 0                           | 0                           | 0                           |
| cf. <u>Rubus</u> spines           | 0                           | 0                           | 0                           | 0                           | 0                           | 0                           | 0                           | 0                           | 0                           | 0                           |
| <u>Aralia</u> seeds               | 0                           | 0                           | 0                           | 0                           | 0                           | 0                           | 0                           | 0                           | 0                           | 0                           |
| <u>Hypericum</u> seeds            | 0                           | 0                           | 0                           | 0                           | 0                           | 0                           | 0                           | 0                           | 1                           | 1                           |
| <u>Galium</u> seeds               | 0                           | 0                           | 0                           | 0                           | 1                           | 0                           | 0                           | 0                           | 1                           | 0                           |
| <u>Rorippa</u> seeds              | 0                           | 0                           | 0                           | 0                           | 0                           | 0                           | 0                           | 0                           | 0                           | 0                           |
| <u>Viola</u> seeds                | 0                           | 0                           | 0                           | 0                           | 0                           | 0                           | 1                           | 3                           | 0                           | 0                           |
| <u>Boehmeria cylindrica</u> seeds | 0                           | 0                           | 0                           | 0                           | 0                           | 0                           | 0                           | 1                           | 1                           | 0                           |
| <u>Rubus</u> seeds                | 0                           | 0                           | 0                           | 0                           | 0                           | 0                           | 2                           | 0                           | 0                           | 0                           |
| <u>Cornus</u> undiff. seeds       | 0                           | 1                           | 0                           | 0                           | 0                           | 0                           | 0                           | 0                           | 0                           | 0                           |
| Bryophyte gametophyte             |                             |                             |                             |                             |                             |                             |                             |                             |                             |                             |
| fragments                         | 0                           | 0                           | 0                           | 0                           | 0                           | 0                           | 1                           | 1                           | 0                           | 0                           |

Macrofossil TypesSample Depth (cm)

|                                               | <u>145 to</u><br><u>150</u> | <u>160 to</u><br><u>165</u> | <u>175 to</u><br><u>180</u> | <u>195 to</u><br><u>200</u> | <u>255 to</u><br><u>260</u> | <u>280 to</u><br><u>285</u> | <u>300 to</u><br><u>305</u> | <u>330 to</u><br><u>335</u> | <u>355 to</u><br><u>360</u> | <u>380 to</u><br><u>385</u> |
|-----------------------------------------------|-----------------------------|-----------------------------|-----------------------------|-----------------------------|-----------------------------|-----------------------------|-----------------------------|-----------------------------|-----------------------------|-----------------------------|
| <u>Carex lenticular</u> achenes               | 0                           | 0                           | 0                           | 0                           | 2                           | 0                           | 0                           | 0                           | 10                          | 5                           |
| <u>Carex trigonous</u> achenes                | 0                           | 0                           | 2                           | 0                           | 0                           | 0                           | 1                           | 2                           | 0                           | 0                           |
| <u>Cyperus strigosus</u> achenes              | 0                           | 0                           | 0                           | 0                           | 0                           | 0                           | 0                           | 0                           | 0                           | 0                           |
| <u>Juncus</u> seeds                           | 0                           | 0                           | 0                           | 0                           | 43                          | 2                           | 10                          | 165                         | 57                          | 71                          |
| <u>Typha</u> seeds                            | 0                           | 0                           | 0                           | 2                           | 0                           | 0                           | 0                           | 2                           | 0                           | 0                           |
| <u>Alismataceae</u> embryos undiff.           | 3                           | 7                           | 10                          | 4                           | 0                           | 0                           | 0                           | 1                           | 11                          | 13                          |
| <u>Najas gracillima</u> seeds                 | 0                           | 0                           | 0                           | 0                           | 0                           | 0                           | 0                           | 0                           | 0                           | 0                           |
| <u>Scirpus validus</u> type achenes           | 0                           | 0                           | 0                           | 0                           | 0                           | 0                           | 0                           | 0                           | 0                           | 0                           |
| <u>Scirpus cyperinus</u> type<br>achenes      | 0                           | 0                           | 0                           | 0                           | 0                           | 0                           | 11                          | 2                           | 65                          | 36                          |
| <u>Polygonum trigonous</u> achenes            | 0                           | 0                           | 0                           | 0                           | 3                           | 0                           | 1                           | 1                           | 1                           | 0                           |
| <u>Scirpus</u> undiff. achenes                | 0                           | 0                           | 0                           | 0                           | 0                           | 0                           | 0                           | 0                           | 0                           | 0                           |
| <u>Scirpus americanus</u> type<br>achenes     | 0                           | 0                           | 0                           | 0                           | 0                           | 0                           | 0                           | 0                           | 0                           | 1                           |
| <u>Dulichium arundinaceum</u><br>achenes      | 4                           | 1                           | 0                           | 0                           | 1                           | 0                           | 1                           | 0                           | 15                          | 1                           |
| <u>Brasenia schreberi</u> seeds               | 4                           | 4                           | 3                           | 4                           | 0                           | 0                           | 0                           | 1                           | 0                           | 0                           |
| <u>Polygonum sagittatum</u> type<br>achenes   | 0                           | 0                           | 0                           | 0                           | 0                           | 0                           | 0                           | 1                           | 0                           | 0                           |
| <u>Nymphaea odorata</u> seeds                 | 0                           | 0                           | 0                           | 0                           | 0                           | 0                           | 0                           | 0                           | 0                           | 0                           |
| <u>Sparganium</u> nutlets                     | 0                           | 1                           | 0                           | 0                           | 1                           | 6                           | 0                           | 0                           | 0                           | 0                           |
| <u>Nuphar</u> seeds                           | 0                           | 0                           | 1                           | 0                           | 1                           | 0                           | 0                           | 0                           | 3                           | 2                           |
| <u>Scirpus cespitosus</u> type<br>achenes     | 0                           | 0                           | 0                           | 0                           | 0                           | 0                           | 2                           | 5                           | 0                           | 0                           |
| <u>Potamogeton</u> endocarps                  | 2                           | 2                           | 0                           | 0                           | 0                           | 0                           | 0                           | 0                           | 0                           | 0                           |
| <u>Nymphaea tuberosa</u> type seeds           | 0                           | 0                           | 0                           | 0                           | 0                           | 0                           | 0                           | 0                           | 0                           | 0                           |
| <u>Nymphaea</u> undiff. seeds                 | 0                           | 0                           | 0                           | 0                           | 0                           | 0                           | 0                           | 0                           | 0                           | 0                           |
| <u>Scirpus smithii</u> type achenes           | 0                           | 0                           | 0                           | 0                           | 1                           | 1                           | 3                           | 0                           | 0                           | 0                           |
| <u>Sagittaria</u> seeds                       | 0                           | 0                           | 4                           | 1                           | 0                           | 0                           | 0                           | 0                           | 11                          | 3                           |
| <u>Eleocharis</u> achenes                     | 0                           | 0                           | 0                           | 0                           | 0                           | 0                           | 0                           | 0                           | 0                           | 0                           |
| <u>Cyperus</u> cf. <u>engelmanni</u> achenes  | 0                           | 0                           | 0                           | 0                           | 0                           | 0                           | 0                           | 3                           | 0                           | 2                           |
| Gramineae undiff. caryopses                   | 0                           | 0                           | 0                           | 0                           | 0                           | 0                           | 3                           | 2                           | 12                          | 3                           |
| <u>Decodon verticillatus</u> seeds            | 0                           | 0                           | 0                           | 0                           | 12                          | 20                          | 1                           | 0                           | 0                           | 0                           |
| <u>Polygonum ramosissimum</u> type<br>achenes | 0                           | 0                           | 0                           | 0                           | 2                           | 0                           | 0                           | 0                           | 0                           | 0                           |
| Characeae oogonia                             | +                           | +                           | -                           | -                           | -                           | -                           | -                           | -                           | -                           | -                           |
| <u>Myriophyllum heterophyllum</u><br>seeds    | 0                           | 0                           | 0                           | 0                           | 1                           | 0                           | 0                           | 0                           | 0                           | 0                           |





Macrofossil TypesSample Depth (cm)

|                  | <u>400 to</u><br><u>405</u> | <u>430 to</u><br><u>435</u> | <u>455 to</u><br><u>460</u> | <u>475 to</u><br><u>480</u> | <u>520 to</u><br><u>525</u> | <u>530 to</u><br><u>535</u> | <u>550 to</u><br><u>555</u> | <u>570 to</u><br><u>575</u> | <u>585 to</u><br><u>590</u> |
|------------------|-----------------------------|-----------------------------|-----------------------------|-----------------------------|-----------------------------|-----------------------------|-----------------------------|-----------------------------|-----------------------------|
| Insect fragments | 21                          | 28                          | 59                          | 31                          | 32                          | 19                          | 5                           | 9                           | 0                           |
| Ehippia          | -                           | +                           | -                           | +                           | -                           | -                           | +                           | +                           | +                           |

Macrofossil TypesSample Depth (cm)

|                                                 | <u>600 to</u><br><u>605</u> | <u>625 to</u><br><u>630</u> | <u>650 to</u><br><u>655</u> | <u>665 to</u><br><u>670</u> | <u>680 to</u><br><u>685</u> | <u>700 to</u><br><u>705</u> | <u>715 to</u><br><u>720</u> | <u>730 to</u><br><u>735</u> | <u>745 to</u><br><u>750</u> |
|-------------------------------------------------|-----------------------------|-----------------------------|-----------------------------|-----------------------------|-----------------------------|-----------------------------|-----------------------------|-----------------------------|-----------------------------|
| <u>Fagus</u> leaves & petioles                  | -                           | +                           | +                           | +                           | +                           | +++                         | +++                         | +++                         | +                           |
| <u>Fagus</u> bud scales                         | +                           | +++                         | +++                         | ++                          | ++                          | +++                         | +++                         | +++                         | +                           |
| <u>Fagus</u> fruits                             | 0                           | 0                           | 1                           | 0                           | 0                           | 0                           | 0                           | 0                           | 0                           |
| Twigs & wood undiff.                            | +                           | +                           | +                           | +                           | -                           | ++                          | +                           | -                           | -                           |
| <u>Chamaecyparis thyoides</u><br>branchlets     | 0                           | 0                           | 0                           | 0                           | 0                           | 0                           | 0                           | 0                           | 2                           |
| <u>Pinus</u> seeds                              | 0                           | 0                           | 0                           | 0                           | 0                           | 0                           | 0                           | 0                           | 0                           |
| <u>Diploxylon Pinus</u><br>needle fragments     | 0                           | 0                           | 0                           | 0                           | 0                           | 0                           | 0                           | 0                           | 0                           |
| <u>Haploxylon Pinus</u><br>needle fragments     | 0                           | 0                           | 0                           | 0                           | 0                           | 0                           | 0                           | 0                           | 0                           |
| <u>Nyssa sylvatica</u> seeds                    | 0                           | 0                           | 0                           | 0                           | 0                           | 0                           | 0                           | 0                           | 0                           |
| <u>Quercus</u> acorns                           | 0                           | 0                           | 0                           | 0                           | 0                           | 0                           | 0                           | 0                           | 0                           |
| <u>Cephalanthus occidentalis</u><br>fruit heads | 0                           | 0                           | 0                           | 0                           | 0                           | 0                           | 0                           | 0                           | 0                           |
| <u>Cephalanthus occidentalis</u><br>nutlets     | 0                           | 0                           | 0                           | 0                           | 0                           | 0                           | 0                           | 0                           | 0                           |
| <u>Cornus obliqua</u> seeds                     | 0                           | 0                           | 0                           | 0                           | 0                           | 0                           | 0                           | 0                           | 0                           |
| cf. <u>Rubus</u> spines                         | 0                           | 0                           | 1                           | 0                           | 0                           | 0                           | 0                           | 1                           | 0                           |
| <u>Aralia</u> seeds                             | 1                           | 0                           | 0                           | 0                           | 0                           | 0                           | 1                           | 0                           | 1                           |
| <u>Hypericum</u> seeds                          | 1                           | 0                           | 0                           | 0                           | 0                           | 0                           | 1                           | 3                           | 1                           |
| <u>Galium</u> seeds                             | 0                           | 0                           | 0                           | 0                           | 1                           | 0                           | 0                           | 0                           | 1                           |
| <u>Rorippa</u> seeds                            | 4                           | 1                           | 0                           | 1                           | 0                           | 1                           | 0                           | 0                           | 1                           |
| <u>Viola</u> seeds                              | 0                           | 0                           | 0                           | 0                           | 0                           | 0                           | 0                           | 0                           | 0                           |
| <u>Boehmeria cylindrica</u> seeds               | 0                           | 0                           | 0                           | 0                           | 0                           | 0                           | 0                           | 0                           | 0                           |
| <u>Rubus</u> seeds                              | 0                           | 0                           | 0                           | 0                           | 0                           | 0                           | 0                           | 0                           | 0                           |
| <u>Cornus</u> undiff. seeds                     | 0                           | 0                           | 0                           | 0                           | 0                           | 0                           | 0                           | 0                           | 0                           |
| Bryophyte gametophyte<br>fragments              | 0                           | 1                           | 1                           | 0                           | 0                           | 0                           | 0                           | 0                           | 3                           |



Macrofossil TypesSample Depth (cm)

|                  | <u>600 to</u><br><u>605</u> | <u>625 to</u><br><u>630</u> | <u>650 to</u><br><u>655</u> | <u>665 to</u><br><u>670</u> | <u>680 to</u><br><u>685</u> | <u>700 to</u><br><u>705</u> | <u>715 to</u><br><u>720</u> | <u>730 to</u><br><u>735</u> | <u>745 to</u><br><u>750</u> |
|------------------|-----------------------------|-----------------------------|-----------------------------|-----------------------------|-----------------------------|-----------------------------|-----------------------------|-----------------------------|-----------------------------|
| Insect fragments | 1                           | 4                           | 3                           | 2                           | 0                           | 4                           | 0                           | 1                           | 0                           |
| Ehippia          | -                           | +                           | -                           | +                           | +                           | +                           | +                           | +                           | -                           |

---

The numerical values for macrofossil abundance represent the number of items per 100 cm<sup>3</sup> of sediment.

Presence/absence values for macrofossils that were unable to be tabulated are as follows:

- = not present in sample    + = present    ++ = frequent    +++ = abundant
